# Supplementary material for: Microarray Analysis of Breast Cancer Gene Expression Profiling in Response to 2-Deoxyglucose, Metformin, and Glucose Starvation
Source: Research Square preprint supplement (doi:10.21203/rs.3.rs-1009145/v1), 2021-10-26
Supplement: Supplementary file 1 [file 9fe4566178616f02835a2d98.xlsx]

## Sheet: 2-DG & MET & GS
TAC																											SAM
3 common upregulated genes in "MCF-7 2-DG vs MCF-7 CTR", and "MCF-7 MET vs MCF-7 CTR", and "MCF-7 GS vs MCF-7 CTR:													7 common downregulated genes in "MCF-7 2-DG vs MCF-7 CTR", and "MCF-7 MET vs MCF-7 CTR", and "MCF-7 GS vs MCF-7 CTR:														0 common upregulated genes in "MCF-7 2-DG vs MCF-7 CTR", and "MCF-7 MET vs MCF-7 CTR", and "MCF-7 GS vs MCF-7 CTR:														5 common downregulated genes in "MCF-7 2-DG vs MCF-7 CTR", and "MCF-7 MET vs MCF-7 CTR", and "MCF-7 GS vs MCF-7 CTR:
Gene symbol													Gene symbol																												Gene symbol
TMPRSS13													ADORA1																												TEX14
AKR1C3													PTPRG																												S100A7
SEL1L3													S100A7A																												S100A8
													TEX14																												S100A9
													S100A7																												CFB
													S100A9
													S100A8

## Sheet: 2-DG & MET
TAC																					SAM
1 common upregulated gene in "MCF-7 2-DG vs MCF-7 CTR", and "MCF-7 MET vs MCF-7 CTR":										1 common downregulated gene in "MCF-7 2-DG vs MCF-7 CTR", and "MCF-7 MET vs MCF-7 CTR":											1 common upregulated gene in "MCF-7 2-DG vs MCF-7 CTR", and "MCF-7 MET vs MCF-7 CTR":											1 common downregulated gene in "MCF-7 2-DG vs MCF-7 CTR", and "MCF-7 MET vs MCF-7 CTR":
Gene symbol										Gene symbol											Gene symbol											Gene symbol
CEACAM5										TTC31											TMC4											S100A7A

## Sheet: 2-DG & GS
TAC																				SAM
3 common upregulated genes in "MCF-7 2-DG vs MCF-7 CTR", and MCF-7 GS vs MCF-7 CTR":										2 common downregulated genes in "MCF-7 2-DG vs MCF-7 CTR", and MCF-7 GS vs MCF-7 CTR":										2 common upregulated genes in "MCF-7 2-DG vs MCF-7 CTR", and MCF-7 GS vs MCF-7 CTR":										1 common downregulated gene in "MCF-7 2-DG vs MCF-7 CTR", and MCF-7 GS vs MCF-7 CTR":
Gene symbol										Gene symbol										Gene symbol										Gene symbol
CDR1; CDR1-AS										ID1										CDR1										ID3
TMEM229B										DSCR8										TMEM45B
CDR1

## Sheet: MET & GS
TAC																					SAM
94 common upregulated genes in "MCF-7 MET vs MCF-7 CTR", and "MCF-7 GS vs MCF-7 CTR":										30 common downregulated genes in "MCF-7 MET vs MCF-7 CTR", and "MCF-7 GS vs MCF-7 CTR":											75 common upregulated genes in "MCF-7 MET vs MCF-7 CTR", and "MCF-7 GS vs MCF-7 CTR":											14 common downregulated genes in "MCF-7 MET vs MCF-7 CTR", and "MCF-7 GS vs MCF-7 CTR":
Gene symbol										Gene symbol											Gene symbol											Gene symbol
NUPR1										HMMR											NUPR1											ADORA1
SLC7A11										KIF14											SLC7A11											NMU
CYP1A1										FAM72C											CHAC1											NR4A3
CHAC1										KIF20A											CREBRF											PCDH19
DDIT3										DLGAP5											RRAGD											PTPRG
TP53INP1										LRR1; RHOQP1											KLF7											TRMU
PCK2										FAM72A											BAIAP2L1											SPAG5
RRAGD										FAM72B											PRSS8											FEN1
CREBRF										NT5DC2											DDIT3											BIRC5
AKR1C1										HIST1H4C											CCNB1IP1											BRINP3
BTG2										FAM72D											GABARAPL1											FAM72B
GPNMB										TIMM50											PCK2											FAM72C
DDIT4										TMEM19											CYP1A1											TMEM19
SLC43A1										SNRNP25											ASNS											FAM72D
TCP11L2										SPAG5											TP53INP1
LETMD1										DEPDC1											KDM5B
RAP1GAP										FEN1											ZNF277
ASNS										SKP2											LETMD1
PHGDH										TRGJ1; TRGC2; TRGJ2; TRGV9; TRGC1; TRGJP; TRGJP2											ASS1
GABARAPL1										BIRC5											TMPRSS13
FAM171B										BRINP3											AKR1C3
PRSS8										MMP16											RAP1GAP
C14orf132										CLSPN											ULBP1
CCNB1IP1; SNORD126										NMU											GDF15
HDAC5										MCM10											EPHA4
KDM5B										CRY1											DDIT4
ASS1										PCDH19											PNRC1
KLF7										TRMU											NR1D1
MAP1B										NR4A3											ZFAND1
EPHA4										GAL											HERPUD1
CALCOCO1																					MAP1B
EIF4A2; SNORA63; SNORD2; SNORA4; SNORA81; MIR1248																					SLC6A9
TPCN1																					AKR1C1
ULBP1																					FAM175A
PNRC1																					SPRY1
ZNF277																					C6orf48
SNORA17A; SNORA17B; SNHG7																					SNORA17A
YPEL5																					ATF4
PCDH1																					DYRK1B
NR1D1																					EIF4A2
BAIAP2L1																					DYRK1B
DTNA																					GPNMB
ABCA12																					GARS
KLHL36																					JMY
DYRK1B																					RHOQ
KDM7A																					SEL1L3
ZFAND1																					PHGDH
LCP1																					CLIC4
ATF4																					METTL12
AKR1C2																					SLC43A1
TTC39B																					PSAT1
SLC6A9																					ME1
BGN																					PTCH1
C6orf48; SNORD52; SNORD48																					HMOX1
SLC25A27																					CORO2A
HERPUD1																					VEGFA
R3HDM2																					NPC2
CDKL2																					PER3
ATXN1																					CD55
PSAT1																					SLC48A1
ABCC3																					CREB5
ACSL1																					SARS
EDA2R																					ERN1
SPRY1																					ABCC3
FAM129A																					HDAC5
CDON																					CLGN
HMOX1																					ATXN1
MXI1																					YPEL2
CLIC4																					CEP57
ERICH2																					EDA2R
PER3																					DTNA
STC2																					EID3
GDF15																					TRIM4
GARS																					FAM231D
PARP8																					TRIM16L
RHOQ
NPC2; MIR4709
SARS
FAM175A
SESN2
CDKN1A
NIPAL2
YPEL2
SQSTM1
PTCH1
JMY
UBE2H
FAM231D; LINC00869
IL17RE
CD55
VEGFA
EID3
PLEKHG1
CREB5

## Sheet: unique genes MCF7 2DG vs CTR
TAC																		SAM
7 upregulated genes included exclusively in "MCF-7 2-DG vs MCF-7 CTR":									5 downregulated genes included exclusively in "MCF-7 2-DG vs MCF-7 CTR":									6 upregulated genes included exclusively in "MCF-7 2-DG vs MCF-7 CTR":									4 downregulated genes included exclusively in "MCF-7 2-DG vs MCF-7 CTR":
Gene symbol									Gene symbol									Gene symbol									Gene symbol
TGFBI									DYRK4									ARRDC4									EPHA4
CHRM1									CCDC88A									TGFBI									PTPN13
ARRDC4									HBA1									PRODH									RAB31
GPR37L1									SLC26A2									EPB41L4A									OGFRL1
CADPS2									GALNT14									CADPS2
MAN2A2																		NRXN3
NRXN3

## Sheet: unique genes MCF7 MET vs CTR
TAC																	SAM
75 upregulated genes included exclusively in "MCF-7 MET vs MCF-7 CTR":								87 downregulated genes included exclusively in "MCF-7 MET vs MCF-7 CTR":									109 upregulated genes included exclusively in "MCF-7 MET vs MCF-7 CTR":									122 downregulated genes included exclusively in "MCF-7 MET vs MCF-7 CTR":
Gene symbol								Gene symbol									Gene symbol									Gene symbol
CAPN2								BORCS7									CAPN2									CNIH2
ELF5								DDX56									ELF5									NR5A2
CLEC7A								GINS3									TCP11L2									FAM111B
CEACAM6								TCF19									CLEC7A									GAL
ENTPD1								THBS1									SEPP1									AADAT
SEPP1								POLE4									VAT1									RRM2
BTN3A2								LANCL2									OPTN									ZWINT
OPTN								NDUFA6									YPEL5									ARHGEF39
MGEA5								E2F7									S100A14									SPC25
SESN1								SRM									FAM171B									CDCA3
VAT1								RAB31									TTC39B									CDC25A
PDE9A								NCAPG2									MBNL2									EFEMP1
S100P								SGK3									ENTPD1									KIF4A
ATP2B4								MKI67									FBXL2									NCAPG
BNIPL								DOCK10									MXI1									RNASEH2A
BTN2A2								SPC25									BTN3A2									CCNE2
SLC35D2								NCAM2									RAB29									ESCO2
POLR2J4								POLE2									UCP2									CCNF
BDKRB2								PRKAR1B									CEP295NL									E2F8
AGO4								C3orf14									BDKRB2									BUB1
KIAA0430; MIR6506								CBX5; MIR3198-2									KLHL24									OLFM1
UGT1A1; UGT1A6; UGT1A4; UGT1A10; UGT1A8; UGT1A7; UGT1A5; UGT1A3; UGT1A9								CDCA8									NOVA1									GINS3
MBNL2								SLC25A25									AGO4									SGK3
KLHL24								LMNB1									GSN									CLSPN
S100A14								PCDHGC3; PCDHGA12; PCDHGB4; PCDHGA8; PCDHGA1; PCDHGA10; PCDHGA11; PCDHGA2; PCDHGA3; PCDHGA4; PCDHGA5; PCDHGA6; PCDHGA7; PCDHGA9; PCDHGB1; PCDHGB2; PCDHGB3; PCDHGB5; PCDHGB6; PCDHGB7; PCDHGC4; PCDHGC5									RFX3									FANCD2
UGT2B15								MPDU1									NOA1									REEP1
UCP2								POLR2E									SLC35D2									MCM10
PCMTD1								LRRN1									PLXDC1									MKI67
PGM5								CDC6									CEACAM5									COQ2
RBMS2								GUCY1A2									DBP									RPA2
FBXL2								CDC45									PCDH1									EXO1
EPAS1								TK1									BTG2									MRPL49
ZMAT3								TFF1									ZMAT3									NDC80
ZNF217								CD3EAP									CD44									TOE1
TMC4								FANCA									TMPRSS2									GTSE1
SBF2								TOMM40									SBF2									TIMM50
LAMC1								EXO1									IRF2BP2									KIF20A
TMPRSS2								FNTB									CHST11									DDX39A
RAB29								FANCD2									IGBP1									ATF5
SSSCA1-AS1								HBA2									CCDC186									GINS1
DRAM2								GTSE1									GDPD1									TOMM40
DSC2								RBM14									TSPAN31									NCOA5
CAMLG								PUS7L									DIRC2									PRKAR1B
PLXDC1								CENPI									DTNA									CDC6
ST6GALNAC6								NDC80									GPR137B									CRELD2
CHST11								COQ2									ABCG1									TRAIP
NOA1								GINS2									LAMC1									LMNB1
GPR137B								REEP1									PGM5									STC1
GSN								NCOA5									LMBRD1									RBM14
NOVA1								RNFT2									PLD1									NOP16
NTN4								NCAPG									EPAS1									DSN1
HNMT								DSN1									ANXA9									CCL2
PLD1								OLFM1									CALCOCO1									UHRF1
DIRC2								KIF4A									MR1									KDELC1
FOXN3								KDELC1									PHF21A									KIF2C
ANXA9								DDIAS									SESN1									SNRNP25
CD44								DDX39A									KDM7A									DNAJA1
CEP295NL; TIMP2								SGK3; C8orf44-SGK3									ZNF224									PMP22
DBP								STC1									CCNG1									PADI2
MR1								TIMELESS									ZNF516									TFF1
PPFIBP2								BUB1									BTN2A2									FBXO5
SLC6A16								E2F8									S100P									CENPI
ASIC1								RRM2									CHD2									KIF22
TPP1								GINS1									TMEM159									POGLUT1
GRIP1								ESCO2									DRAM2									LANCL2
PTK2								NR4A1									HBP1									MMP16
TSPAN31								TOE1									ACSF2									LRRN1
SAMD4A								CCNF									SENP7									HMGB3
CCNG1								CDC25A									GPR37L1									WDR62
SLC12A6								KIF2C									FBXL20									SKP2
ZFAND3								RNASEH2A									RNF152									USP11
CCDC186; MIR2110								USP5									C14orf132									CENPN
RFX3								ELOVL4									GRIP1									BRI3BP
LMBRD1								CCNE2									NTN4									GUCY1A2
IRF2BP2								ATF5; MIR4751									ENPP5									E2F7
								UHRF1									YPEL3									DDIAS
								MGC27345									UGT2B15									MAD2L1
								EFEMP1									PDE9A									TIMELESS
								AADAT									ZFAND3									USP5
								ZWINT									ERMP1									ELOVL4
								FAM111B									SYF2									GNL2
								CCL2									FOXN3									CDC45
								ARHGEF39									DIAPH2									E2F2
								CDCA3									CLDN4									SFPQ
								PMP22									ADPRM									PDCL3
								CNIH2									RHOC									TFIP11
								NR5A2									TPCN1									DDX56
																	BNIPL									BORCS7
																	HNMT									KIFC1
																	C9orf85									SHCBP1
																	JUND									CENPF
																	QPRT									PLK1
																	ACSL1									PSMC3IP
																	ZNF217									GINS2
																	CDKL2									TFF3
																	CSNK2A2									FNTB
																	GPX8									SUV39H1
																	CEACAM6									SFXN2
																	MGEA5									C3orf14
																	NRSN2-AS1									POLE4
																	PCMTD1									MPDU1
																	SLC46A3									TEX30
																	HYKK									PCDHGC3
																	LCP1									HMMR
																	ACTA2									RTKN2
																	DUSP10									CBX5
																	WSB1									NCAPG2
																	TPP1									NUDC
																	MAP1LC3B									NDUFA6
																										MGC27345
																										HMBS
																										CCNA2
																										NCAPH
																										BRCA1
																										HSPH1
																										UBE2S
																										FTSJ1
																										LRR1
																										DEPDC1
																										IL20
																										NUBP1
																										TCF19

## Sheet: unique genes MCF7 GS vs CTR
TAC																	SAM
625 upregulated genes included exclusively in "MCF-7 GS vs MCF-7 CTR":								260 downregulated genes included exclusively in "MCF-7 GS vs MCF-7 CTR":									395 upregulated genes included exclusively in "MCF-7 GS vs MCF-7 CTR":									54 downregulated genes included exclusively in "MCF-7 GS vs MCF-7 CTR":
Gene symbol								Gene symbol									Gene symbol									Gene symbol
TM4SF1								RAB34									FAM129A									TXNIP
OSGIN1								RCN2									BGN									MUCL1
ATF3								TECTA									ERO1B									ID1
ERN1								APAF1									RAB39B									HPGD
ERO1B								CUL3									TM4SF1									ARRDC4
ERRFI1								MMP13									STC2									LXN
GRPR								PHTF1									GRPR									DSCR8
CLGN								TOP2A									ATF3									FASN
RAB39B								C11orf98; LBHD1									TRIB3									FABP6
CREB3L2								TRAPPC1									HYOU1									CD59
AFF3								PDCL3									HYOU1									CCNB2
TRIB3								TDRD15									AFF3									VTCN1
SLC48A1								TRAPPC12									HYOU1									CCNB1
TRIM16L								TTI2									CREB3L2									PTTG1
DLX5								PLK1									HYOU1									FRK
NCR3LG1								FGF9									NUCB2									C15orf59
SLC1A4								CALML4									HYOU1									KCNK2
MANF								ATXN7L3									OSGIN1									MRPL36
TFF3								PURB; MIR4657									ERRFI1									PCNA
PGPEP1								NDUFB6									HYOU1									DYNLL1
HYOU1								C11orf91									NCR3LG1									FLOT1
ACKR3								BCL2L15									SLC1A4									TRGJ1
TNS3								MALT1									SESN2									CDC20
TUBA4A								TCF3									DLX5									ID2
NUCB2								PSME2; MIR7703									HSP90B1									PPP2R1B
HSP90B1								UQCRFS1									WARS									GATSL2
WARS								CTNND2									ACKR3									CLEC3A
PER1; MIR6883								ACACA									MANF									CKS2
TMEM45B								DNAJC9									FBXO32									KIF14
TES								NDUFA2									HYOU1									FAM72A
LAMP3								POP5									HYOU1									LAMTOR5
LIN7A								C1QA									CRELD2									SMAD6
HSPA5								TCEB2									HSPA5									GCA
GPT2								PKIB									PGPEP1									NOP10
PLEKHH2								CLP1									HYOU1									SRSF2
CDT1								C9orf40									GPT2									DLGAP5
DCBLD2								UBE2C									HYOU1									CMC2
GRIK3								POMP									CDT1									AURKA
FBXO32								MRPS12									PLEKHH2									DNAJC9
ETV5								KIF18B									AGR2									S100A13
PLEKHA6								MALSU1									MBOAT1									PSMB3
SCD5								FAM83D									SYVN1									SLC6A14
CYP4F11								TRAPPC4									ZFP36L2									PLBD1
PRSS16								SMPDL3A									GRIK3									AMD1
DNAJB9								UBL5									FICD									METTL7A
AGR2								PCDHB4									TFF3									KNTC1
ZFP36L2								KNSTRN									ERICH2									LDHA
CACNG4								SNRPG									MTHFD2									CDKN3
ERMAP								NOP16									DEPTOR									EDRF1
MTHFD2								DEPDC1B									ARHGEF2									TAF5
MOK								GULP1									SCD5									UQCR10
CRELD2								SMAD7									CYP4F11									SAMHD1
UGDH								FAM208A									HYOU1									EXOSC9
SDF2L1								POLR2H									CYBRD1									IARS2
FLRT3								PCDHB16									CBLB
HSPA6								GTF2H5									ATP2C2
DEPTOR								USP47									DNAJB9
CCNJL								FBP1									ATP8B2
ZBTB21								SLX1A; SLX1B; SLX1A-SULT1A3; SLX1B-SULT1A4; SULT1A3									KDM4A
RUNX2								FAM122B									CACNG4
SNTB1								TRAM2									PXK
FNDC3B								CCM2									PLEKHA6
MBOAT1								KIF1BP									BHLHE40
NCKAP5								TENM3									PDIA4
CYBRD1								SUPT20HL2									LRRC8D
PRNP								SNRPD1									DNAJC3
CBLB								ELOVL6									HYOU1
KDM4A								USMG5; MIR1307									ZBTB21
FECH								LY6G5C									PRSS16
SH3BP2								SAP30L									SH3BP2
ARHGEF2								MYLIP; MIR4639									NEDD4L
PGD								KCNN4									LAMP3
BHLHE40								SRGN									HIPK2
HIPK2								WDR12									TNS3
LIPH								TUBGCP3									RUNX2
SYVN1								ITFG2									SDF2L1
BEST1								TMA7									UGDH
METTL12; SNORA57								DNAJB11									SLC7A1
ARSG								FAM174A									RERG
LRRC8D								MAD2L1									CEBPG
ATP2C2								ANAPC7									HYOU1
NEDD4L								LBR									ENPP1
MAPRE2								ANKLE2									HYOU1
IL6R								SLC10A1									NRSN2
ABAT								ARHGAP11B; ARHGAP11A									LPP
TEF								PTGDR2									TES
FICD								MRPL16									LIPH
ABHD2								CRKL									HSP90B1
SLC25A45								NEK2									COBLL1
ZNF416								GEMIN7									KCNQ5
ZNF664								RANBP1									OSTC
PDIA4								PPP1R12A									LIN7A
PXK								MYLK4									FNDC3B
SGK223								ORAOV1									HYOU1
LRRC8C								NDUFAF4									NPNT
CTAGE5								PCP4									RNF187
RAB30								PDE4D									RAB30
PPP1R15A								CASP16P									SFXN2
SULF1								TBC1D3K									ZNF664
RWDD2B								RWDD3; TMEM56; TMEM56-RWDD3									KIAA0040
AJUBA								SUV39H2									CLN6
TSPYL2								PSCA									RNF125
NRSN2								CCL7									NR1D2
ATP8B2								ZNF106									BEST1
TMEM150C								CCNE1									CTAGE5
RNF125								MYL6B									SNTB1
EPHX1								HSPE1									HYOU1
COBLL1								POLR3G									FECH
INAFM1								SUSD3									HYOU1
KCNQ5								HIGD1A									LRIG1
RERG								PGAM1									RAD9A
PMAIP1								DNMT3B									PGD
HSP90B1; MIR3652								IER2									ABHD2
BCL6								CCT6A									TEF
DNAJC3								PHLDA2									SFMBT2
JDP2								TRMT10C									SHMT2
CDKL5								MLKL									BAIAP2
SLITRK6								ARPC1A									ARFGAP3
PIK3R1								MRPL51									GADD45A
ARHGAP26								GMNN									EXT1
CSRNP2								CRYZ									ARSG
RNF187								KIF23									TMEM154
SRXN1								SELL									SGMS2
SEC24D								ZC3HC1									AARS
SFMBT2								C2orf15andLIPT1andMRPL30; C2orf15									NCKAP5
BMP7								FBXO18									SEC24D
NR1D2								IER3									RWDD2B
HDLBP								SPINK4									MSTO1
HOOK2								POLR2L									STEAP3
ME1								HOMER1									TMEM184A
PRRT3								NUBP1									PRKCZ
SARM1								POLE									BCL6
TSPAN9								SOCS2									MOK
OSTC								BUB1B									ETV5
CARS								PIN4									CSRNP2
BCL2L1								DDX26B									CBX4
SLC39A14								VRK1									PI4K2A
MSTO1; MSTO2P								MELK									SLITRK6
MRPS27								NUP205									EPHX1
SHMT2								PSMA4									HYOU1
SLC7A1								MRPL20									PLEKHA6
DET1								KRT27									MAPRE2
GPAT3								ATP6V0A4									SLC39A14
LPP								CENPF									TNFRSF10B
NQO2								COX7B									KDELR3
CLN6								PIEZO1									NOB1
ZC3H12C								ASPM									BMP7
SFXN2								MINOS1									EDEM1
MPPED2								FAM151B									ZNF490
NT5C2								EXOSC9									ZC3H12C
ATP9A								EMC8									SGK223
CEBPG								SMC2									PRRT3
FOSL1								CHCHD1									LRRC8C
SCARA3								GNL2									MBD6
CCDC170								PRAMEF2									JUN
KIAA0040								OR5AU1									FAM117A
NPNT								CSTA									BCL2L1
PRKCZ								HN1									ABAT
SLC16A9								LDHA									YARS
RGCC								IARS2									CDKL5
BAIAP2								PRKCD									BBOF1
DUSP16								CBWD6; CBWD5; CBWD7									CARS
CDK2AP2								PLOD2									CCNJL
ACTG2								CCNA2									CREG1
GADD45A								HIST1H2BM									TSPYL2
YARS								FUS									ARHGAP26
JUN								KPNA2									ERMAP
C17orf58								PPP1R10									PRNP
PI4K2A								NSUN2									ARSD
MEF2A								DHX15									MPPED2
ZNF91								GTF3C6									CERS1
ENPP1								TM2D3									LZTFL1
TMEM154								EEFSEC									INAFM1
TCEA1								DNAJA1									DET1
MAP3K12								NDUFAF5									MARS
TNFRSF10B								C21orf59									PIK3R1
ARFGAP3								KNTC1									NAALADL2
DUSP4								SHCBP1									CDON
RORA								P2RY2									SCARA3
DNAJB5								LTV1									SPEF2
NOB1								ZWILCH									SGK3
KRT80								PGP									PTGER3
PLEKHG4								CHUK									HSPA6
ZSWIM6								TAF5									SLC7A2
TRAM1								SNRPD3									SLC31A1
WLS								LINC00525									PLEKHG4
TMEM184A								LINC00173									PTPRJ
EHF								FAIM									CHID1
TNS2								FLOT2									MAP3K12
ARSD								SERTAD4									SARM1
ERLIN2								PSMB3									EFHD1
KIAA0513								SRSF7									TMEM116
FHL3								SLC12A2									KRT80
EXT1								CENPW									EXT1
STEAP3								ZDHHC6									TCEA1
RFFL								SCIN									TUBE1
MBD6								AMD1									ATP9A
SGK3								UQCR10									GPR143
GCLM								S100A13									DEPDC4
ST8SIA4								EMC6									PER1
MAML2								B3GLCT									MRPS27
EFHD1								LTBP1									IL17RE
CFTR								ATP2A3									SEL1L
TXNRD1								AURKA									NEU1
NSMF; MIR7114								IFIH1									ZNF91
TMEM39A								GATS									TSPAN9
AAK1								CMC2									DBN1
LCA5L								LSM1									TNS2
LRIG1								HSPBP1									LHFPL2
ZNF490								SNED1									TSC22D3
ALDH3B2								SAMHD1									CCDC170
DEPDC4								TEX30									FAM167A
PEG10								DIAPH1									PACSIN2
HSPA13								METTL7A									MEF2A
TMEM37								NDUFB1									THRB
ZNF84								MRPS17									SGK3
TMCO4								RNF145									CDK2AP2
NAALADL2								C17orf47									SERINC5
PDK1								NOP10									FKBP2
BMP6								SYTL5									SLC1A5
CBX4								LAMTOR5									FBXO16
C1orf168								CDC20									FLRT3
MCOLN3								PCNA									ALDH3B2
PTPRJ								CLEC7A									EFCAB13
EDEM1								SMAD6									IL6R
SLC38A6								CDKN3									HOOK2
TRIM4								MRPL36									AJUBA
SGTB								CKS2									MCOLN3
RAD9A								DYNLL1									LRIG1
HILPDA								PLBD1									HSPA13
RIT1								EDRF1									GP1BB
CDKN1B								JAZF1									KIAA1324
NMNAT2								SLC6A14									CCNG2
CREG1								ID2									NMNAT2
SERINC5								SSFA2									ZCCHC7
2021-03-08								HMGN3									AUTS2
PIM1								GCA									GTF2IRD1
ABCB6								FRK									SGTB
POTEB								SRSF2; MIR636									SRXN1
KDELR3								GATSL2									EHF
ABHD4								CFB									PDIA6
SPRED2								BASP1									PRKAR2B
SLC31A1								ID3									GPAT3
TSC22D3								PPP2R1B									AFF3
SLC7A2								CLEC3A									UBE2H
RUSC2								FASN									RNF41
THRB								CCNB1									MDM4
RNFT1								FABP6									FNIP1
MATK								KCNK2									TMEM50B
TUBE1								CD59									FHL3
TMEM238								CCNB2									NIPAL2
WIPI1								PTTG1									ELP2
PER2								VTCN1									TMEM39A
GNAI1								C15orf59									PDIA3
TMEM50B								FLOT1									TRANK1
BBOF1								LXN									RFFL
MXD1								ARRDC4									SOS2
EML2; MIR330								HPGD									LDLRAD3
ZNF493								MUCL1									PLEKHG1
CDNF								TXNIP									TMEM150C
DBN1																	ZSWIM6
ZNF275																	RUSC2
AARS																	TUBA4A
MACC1																	ANKRD11
NEU1																	KIAA0513
PACSIN2																	ACTG2
TBC1D8																	ZNF84
CCNG2																	TRAM1
GP1BB; SEPT5																	44263
ABCC2																	CEBPB
WDR45; PRAF2																	CDR1
ZNF140																	ORAI2
PAG1																	ADCK4
CHID1																	RORA
ACSS1																	RAP1GAP2
SGMS2																	PDK1
DPP7																	ZNF460
ADGRG1																	ABCB6
FAM117A																	SLC16A9
AUTS2																	PMAIP1
SOX4																	PDGFRL
GTF2IRD1																	TARS
ALDH6A1																	SULF1
XYLB																	CDKN1B
PDE4B																	MYADM
PLSCR3; TMEM256; TMEM256-PLSCR3																	PDE4D
ELP2																	UNC93B1
TMEM241																	CALR
SLC7A8																	REEP6
CEBPB																	ELL2
GLMP																	GRB10
CBS																	TMCO4
POTEF																	MATK
HLA-E																	ZNF85
LHFPL2																	ZNF567
KIDINS220																	SASH1
FADS1; MIR1908																	GAB2
PPIL6																	FAM102A
EYA4																	AKR1C2
MICAL2																	PHACTR2
VAMP2																	RIT1
SGK3; C8orf44-SGK3																	MMP25-AS1
LYRM9																	CDNF
TAOK3																	GMPPB
MAMLD1																	TUBB3
ZNF780B																	ST8SIA4
SPEF2																	ZNF160
FKBP2																	TMEM238
AHNAK																	INPP4B
NEIL1																	FOXP1
ZNF85																	LMCD1
STK40																	ZNF493
OSR2																	ABCA12
UNC93B1																	TCTA
ATP6AP1L																	PHACTR2
CABYR																	THG1L
PARM1																	DCBLD2
CORO2A																	DYRK3
MAP1LC3B																	C17orf58
ZNF727																	SPRED2
XRRA1																	TCTN1
SLC25A36																	STXBP5L
ARMCX3																	SLC7A8
FSD1L																	POFUT1
SLC1A5																	POTEF
MARS; MIR6758																	PLSCR3
KIAA1324																	XRRA1
ZNF721; ABCA11P																	SLC25A45
FBXO25																	PRKCH
FBXO16																	CDKN1A
ST6GALNAC2																	DCP2
GPR143																	PPARD
ZNF460																	KIAA1147
ANXA3																	KCNK5
FAM102A																	SLC39A6
GLB1L																	XPOT
GLTSCR2; SNORD23																	TXNRD1
SLC25A29																	ZNF275
IFRD1																	DYM
EXT1; hunera																	TBL1X
PRKCH																	SLC25A37
ZNF160																	SLC25A36
C19orf48; SNORD88B; SNORD88C																	MAML2
ZNF716																	CBS
SPATA6																	SEC63
SEL1L																	SLC2A11
PDGFA																	MXD1
NLE1																	ZNF419
SEC63																	ARMCX3
SLC25A37																	NT5C2
RBM3																	RBM3
DENND6B																	OSR2
C6orf141																	MAP4
SPATA7																	NCOA7
GRB10																	WDR45
SOS2																	GZF1
TUBB3; MC1R																	STK40
FADS3																	DEFB109P1B
CEP57																	ZNF716
MED21																	BAGE5
CALR																	JDP2
SMIM14																	TMEM209
RNF41																	ADGRG1
SLC35F6																	ANXA3
LRRN1																	SYCP2
PIGL																	SERP1
TMEM209																	ZNF416
STXBP5L																	SIL1
SCPEP1																	SPRY4
DMGDH																	ECE1
NDRG1																	C1orf168
REPS2																	TKT
IER5																	ZNF704
PRR15L																	DNAJC4
POTEJ																	NRIP1
EFCAB13																	EHD2
CYP4V2																	RNFT1
RNF144B																	PRKCE
SLC10A5																	ZNF674
USP54																	LTBP4
THG1L																	CDV3
BCAM																	NQO2
ACADS																	DUSP4
LTBP4																	CNNM2
SORBS3																	ERLIN2
CNKSR3																	SPATA7
TRANK1																	ZNF473
SLC25A23																	SLC35F6
LPIN2																	SPATA6
CERS1; GDF1																	SIM2
NCOA7																	PARP8
WWP1																	IARS
MCMDC2																	MACC1
ZBTB3																	ST6GALNAC2
ATP8B1																	SUSD6
ZNF396
INPP4B
TMEM231
ZNF429
TESK2
HOXB9
BLNK
MYO1B
CECR2
ZNF473
MAN2B2
ALPK1
SPIRE1
MRGPRD
ABCC5
PRKCE
HK2
CDK14
GRPEL2
ATG13
ELL2
ABCC11
ANKRD11
GPX2
SPRY4
ADGRE5
TRIM8
RAP1GAP2
CYFIP2
SPATA2
DNAJC4
LZTFL1
TCTA
TMEM116
CLIP4
ZMYM5
ZNF704
FAM214A
EIF3L
NRSN2-AS1
PHACTR2
PRKCA
LMCD1; LINC00312
SERP1
STOX2
MDM4
PTTG1IP
PRKAR2B
MAPRE3
ZNF567
ZNF358
FBXL16
GTPBP2
DNAJB11
ZFP90
PTK2B
ZNF98
DCP2
ORAI2
POFUT1; MIR1825
ZNF223
SLC22A18
RNF24
GAMT
NOTCH2NL
TARS
ERBB4
MOB3A
FOXJ3
SUSD6
IKBKG
HSPA12A
PDIA6
TMEM182
SESN3
ABHD11
FNIP1
CCT6B
TMEM67
CNNM2
TCTN1
MAP4
SENP8
TBL1X
2021-09-10
UAP1L1
TJP2
SRPK2
SASH1
GLI3
ECE1
DCAF5
VEPH1
PDGFRL
SLC43A2
EHD2
SLC2A11
ANKAR
GAB2
HSD17B12
HINT3
IARS
LSM14B
PDIA3
CIART
HDAC7
SGSH
ZNF76
SLC33A1
ZCCHC7
XPOT
FAM174B
SLC25A39
CAMK1D
PPIB
PYCR1
REEP6
RPS3A
RAB36
C9orf43
PDE4D
ZNF141
NFKBIL1
MTMR7
ARHGEF38
FAM167A
IPO7; SNORA23
RAB6A
ZNF227
AMN1
ZNF430
TCAIM
LDLRAD3
IGFBP2
ITPKC
ADPRHL1
BBS1
JUND
CREB3L4
DNAJB4
SELM
SFXN5
RHBDD1
CNPPD1
B4GALNT1
ZNF326
CPEB4
BEX2
STX5
DCP1B
LINC00174
NPY1R
TKT
FOXO3
ZNF419
MYADM
FAM86B2
BRINP2
ARRDC3
RNF185
HPS4
IFT140
ITM2C
SLC39A6
HLCS
CRY2
ULBP2
GAB1
IDS
FLVCR2
RPS9
KRBOX4
GPD1L
AKAP9
ALG1; NAGPA-AS1
PRKAA2
TOM1
CCDC110
AP1S2
YPEL1
SLC9A1
SH3GL3
GPX8
SIL1
DPH6
SLC35E2B
ZNF740
GCDH
ADCK4
GZF1
ATRNL1
CRABP1
TRIM16
LMLN
CDV3
PLA2G6
CAMK2B
SSPN
TCEA3
ZNF850
TM4SF1-AS1
HSPG2
FOXP1
CNST
ZNF26
SLC29A2
PHYKPL
POTEE
SMAD3
SLC20A2
TEX19
HIST1H2AK
KIAA1147
CCDC174
FYN
FLCN
METTL21B
UBE2E1
BDH1
LMO4
ZNF568
DYM
CRIM1
SDC2
ZNF268
NRIP1
OSBPL6
AGBL5
SLC9A8
GRINA
