# Supplementary material for: Microarray Analysis of Breast Cancer Gene Expression Profiling in Response to 2-Deoxyglucose, Metformin, and Glucose Starvation
Source: Research Square preprint supplement (doi:10.21203/rs.3.rs-1009145/v1), 2021-10-26
Supplement: Supplementary file 2 [file a12a3a50338d0897bb6bfda7.xlsx]

## Sheet: 2-DG & MET & GS
TAC																																					SAM
155 common upregulated genes in "MDA-MB-231 2-DG vs MDA-MB-231 CTR", and "MDA-MB-231 MET vs MDA-MB-231 CTR", and "MDA-MB-231 GS vs MDA-MB-231 CTR:																		27 common downregulated genes in "MDA-MB-231 2-DG vs MDA-MB-231 CTR", and "MDA-MB-231 MET vs MDA-MB-231 CTR", and "MDA-MB-231 GS vs MDA-MB-231 CTR":																			143 common upregulated genes in "MDA-MB-231 2-DG vs MDA-MB-231 CTR", and "MDA-MB-231 MET vs MDA-MB-231 CTR", and "MDA-MB-231 GS vs MDA-MB-231 CTR:
Gene symbol																		Gene symbol																			Gene symbol
ADGRG1																		PHLPP2																			DUSP1
LAMB3; MIR4260																		PHF20L1																			HSP90B1
EGR1																		TTF2																			ZFP36
HERPUD1																		CCNA2																			SLC2A3
NDRG1																		FBXO5																			TNFAIP3
DUSP1																		HIST1H2AK																			SLC2A14
DUSP6																		LTV1																			SAT1
CALCOCO1																		PRPF39																			IL1A
PTK2B																		RNF220																			CREBRF
LAMC2																		CDCA2																			ARRDC3
STC1																		SKP2																			BHLHE40
ACSL5																		ABHD3																			EGR1
SHANK2																		ARHGEF39																			IRAK2
HLA-E																		POLA1																			STC1
DUSP10																		BLM																			HBP1
TPP1																		ARHGAP11B																			HES1
HES1																		MCM10																			ADGRG1
UBA1																		HELLS																			PPP1R15A
LHPP																		PPME1																			NDRG1
TCP11L2																		ATAD2																			DUSP6
SPRY4																		DNA2																			GADD45A
JUND																		MCM6																			HERPUD1
SEL1L3																		POLE2																			FBXO32
IRAK2																		DARS2																			DUSP5
CDKN1A																		HIST1H4A																			MXD1
PITPNM1																		HIST1H2AB																			SPRY4
JUN																		CRLF3																			YPEL5
SERPINE2																																					ZFP36L1
ABCC3																																					CBLB
GYPC																																					IER2
IGFBP7																																					ZBTB43
SGK1																																					UBE2L6
CRELD1																																					GMFG
PPP1R15A																																					EPAS1
HSP90B1; MIR3652																																					RALGDS
THSD4																																					KDM7A
GLIPR1																																					TIPARP
LRRC8A																																					SERPINE1
IFI16																																					ERO1B
CTSB																																					GRAMD1A
ZFP36																																					IRF9
RPS6KA2																																					TMEM159
EPAS1																																					LHPP
TIMP1																																					BACH1
IGFBP6																																					ELL2
CASP4																																					CLDN12
ESAM																																					ASS1
IRF9																																					TCP11L2
ERO1B																																					KLF6
GLTSCR2; SNORD23																																					JUN
S100A6																																					DUSP10
TMEM71																																					P2RX4
LAMB1																																					SEL1L3
IER2																																					CALCOCO1
TNFAIP3																																					LGALS3
SLC2A3																																					MMP14
MMP14																																					SERPINE2
CREBRF																																					TNFSF15
VEPH1																																					KLF4
TMEM156																																					NIPAL3
SLC16A1																																					HLA-A
TGIF1																																					HLA-E
DUSP4																																					B3GNT5
AP1G2																																					LAMB3
MCL1																																					SERTAD1
CLDN12																																					TMEM173
PLAT																																					GLIPR1
ARRDC3																																					HSPA5
ORAI1																																					IGFBP7
ADTRP																																					LRRC8A
PDLIM5																																					TRIB1
SRPX2																																					CTSB
ABTB2																																					GRN
ASS1																																					COL6A2
EPGN																																					BDH2
TRIB1																																					ATG13
SEMA4B																																					TMEM71
SAT1																																					TMEM156
CST3																																					CHMP2A
TNFSF15																																					RIPK2
SERPINE1																																					ABCC3
FHL1																																					TGIF1
RALGDS																																					MXRA7
SEC31A																																					LGALS3BP
RIPK2																																					S100A6
UFM1																																					HLA-B
ZEB1																																					PTK2B
CSF3																																					GLTSCR2
CHST11																																					JUND
JUNB																																					PLAT
IL1B																																					PHLDA2
EPHX1																																					CST3
PHLDA2																																					FHL1
MVP; PAGR1																																					SLC16A1
KLF6																																					TPP1
ZFP64																																					PDLIM5
GSN																																					EIF2S3
PMAIP1																																					SIL1
H6PD																																					ABTB2
BHLHE40																																					MYOF
ANXA6																																					RPL27A
DNAJB9																																					RNF19B
POLD4																																					UBA1
TMEM173																																					POLD4
HLA-B																																					IFI16
REPS2																																					MCL1
IL1A																																					ERRFI1
ELL2																																					DNAJB9
R3HDM4																																					MCTP1
GRN																																					UFM1
CBLB																																					ANXA6
NOG																																					GRN
GCOM1; MYZAP; POLR2M																																					ABHD14B
DALRD3																																					GYPC
YPEL5																																					OAF
STAT2																																					AP1G2
EIF2S3																																					PRSS3
B3GNT5																																					WWTR1
KLF4																																					STAT2
SYS1-DBNDD2																																					CD9
DUSP5																																					DBNDD2
GRAMD1A																																					CAPG
PKM																																					SHANK2
HLA-A																																					R3HDM4
OAF																																					G0S2
PLA2G16																																					CDCP1
NPC2; MIR4709																																					ACSL5
OS9																																					CREG1
FBXO32																																					CTH
HSPA5																																					TIMP1
CLIP4																																					DNAJC4
KDM4C																																					PLA2G16
SAT2																																					H6PD
DBNDD2																																					RHOB
LRIG1																																					OS9
SLC2A14																																					CTBP2
AGTRAP																																					DALRD3
RBCK1																																					GLRX
FOS																																					SGK1
ZBTB43																																					SRPX2
HSP90B1																																					PNRC1
CREG1																																					SNORD49A
SLC48A1																																					RING1
SARS
GADD45A
RNH1
TIPARP
PTPRE
HBP1
COL6A2
BCLAF1
MAP3K7CL
SERTAD1
MXRA7
P2RX4

## Sheet: 2-DG & MET 
TAC																												SAM
78 common upregulated genes in "MDA-MB-231 2-DG vs MDA-MB-231 CTR", and "MDA-MB-231 MET vs MDA-MB-231 CTR":														28 common downregulated genes in "MDA-MB-231 2-DG vs MDA-MB-231 CTR", and "MDA-MB-231 MET vs MDA-MB-231 CTR":														52 common upregulated genes in "MDA-MB-231 2-DG vs MDA-MB-231 CTR", and "MDA-MB-231 MET vs MDA-MB-231 CTR":														1 common downregulated gene in "MDA-MB-231 2-DG vs MDA-MB-231 CTR", and "MDA-MB-231 MET vs MDA-MB-231 CTR":
Gene symbol														Gene symbol														Gene symbol														Gene symbol
TXNIP														BRCA1														NR1D1														ZNF594
LOXL1														ZNF780A														TXNIP
GMFG														CHPT1														SLC20A1
ANG; RNASE4														ROR1														KLF7
YPEL3														POLQ														SEMA4B
VPS28														PLEKHA8P1														IER3
CALB2														MYBL2														AKR1C3
ABCA3														DCLRE1A														YPEL3
KCTD13														PRIM1														CALB2
AKR1C1														ZNF530														IRF2
TMEM143														TTC30A														ANG
LGALS3														MICALL2														MYC
IL31RA														GAS8														KCTD13
FHIT														ND6														PLAG1
TMEM158														OGDHL														PAQR5
CTSD														RAD54B; FSBP														RAC2
BBS9														RRNAD1														MTMR11
CD9														SPATA5														THSD4
AKR1C3														VPS13C														SLC25A23
WWTR1														ZNF594														S100A13
TNC														SIDT1														LOXL1
IL1RAPL1														SDPR														CTSD
DYSF														FAM25A														HSPB2
MCTP1														ASAP3														FHIT
SDC3														CHMP7														SDC3
PAQR5														NCAN														ZER1
CDCP1														LINC00273														PLD3
BHLHE41														JAZF1														DAB2
NR1D1																												IL1RAPL1
EXD2																												ARHGEF3
PNRC1																												LRP10
ZER1																												CREB5
FLNA																												TAPBP
MGST3																												LEMD2
PLEKHA6																												VPS28
RUNX2																												C10orf11
CUL7																												TMEM158
IRF2																												LTBP4
MTMR11																												PROS1
2021-09-06																												MGST3
LRP10																												SEPN1
GLRX																												TTLL3
RNF19B																												MAGED1
DNAJC4																												CUL7
KDM7A																												CRAT
TAPBP																												SNCAIP
PPP2R5B																												44445
VAMP2																												BBS9
SH2B3																												CDA
CREB5																												HEBP1
PVRL2																												AKR1C1
CA13																												PML
SNCAIP
FURIN
CCNG2
LRRC41
RFX3
KLF7
WIPI1
SIK1
ABHD14B
SLC25A23
HEBP1
MYC
MAGED1
TPBG
QPCTL
ELOF1
CD276
RAC2
IER3
CDA
SEC24D
PTPN14
C10orf11
SLC20A1
ZFC3H1
ARHGEF3

## Sheet: 2-DG & GS 
TAC																											SAM
148 common upregulated genes in "MDA-MB-231 2-DG vs MDA-MB-231 CTR", and MDA-MB-231 GS vs MDA-MB-231 CTR":													26 common downregulated genes in "MDA-MB-231 2-DG vs MDA-MB-231 CTR", and "MDA-MB-231 GS vs MDA-MB-231 CTR":														222 common upregulated genes in "MDA-MB-231 2-DG vs MDA-MB-231 CTR", and MDA-MB-231 GS vs MDA-MB-231 CTR":														8 common downregulated genes in "MDA-MB-231 2-DG vs MDA-MB-231 CTR", and "MDA-MB-231 GS vs MDA-MB-231 CTR":
Gene symbol													Gene symbol														Gene symbol														Gene symbol
MMP1													PSMD1														MMP1														PPME1
PDE2A													ATP6V1E2														TMEM171														DARS2
PGLS													FRRS1														SNAI2														HIST1H2BM
CTSS													ANP32E														PDE2A														SNX5
ARSD													NUP155														AKAP12														BORCS7-ASMT
AKAP12													MASTL														ARSD														TAF5
TMEM171													TBC1D31														SLC3A2														HELLS
EVI2A; EVI2B													AGPAT4														TRIB3														MNS1
PLXNA3													BAHCC1														ITGA2
EMP1													MYPN														EMP1
SLC1A4													FAM72D														CTSS
SERPINB8													NMU														PGLS
STX3													RUVBL1														LAMB1
MANF													TIAL1														STEAP3
TMEM63A													ASTL														STX3
STEAP3													WDR17														SH3KBP1
EVC													MS4A4E														EVI2A
TRIB3													SCAI; GOLGA1														MANF
SLC6A9													PREX1														LAMC2
CYB5D1													TAF5														SLC9A3R2
SLC9A3R2													AS3MT														HYOU1
LOX													SNX5														EVC
SLC3A2													CDKN3														CORO2B
CORO2B													BORCS7-ASMT														SERPINB8
FAM167A													HIST1H2BM														SLC1A4
WDR45; PRAF2													TMEM167A														AHNAK2
AHNAK2																											LURAP1L
PSORS1C1																											FKBP2
HYOU1																											SEC31A
C16orf58																											TMCC3
ROBO4																											CASP4
ABLIM3																											VEPH1
FKBP2																											HYOU1
TM4SF19-TCTEX1D2																											ESAM
C21orf33																											PTPRB
LURAP1L																											SPATA20
SPATA20																											GPR108
PLXNA2																											ABLIM3
ARHGEF2																											SFXN3
ADAMTSL1																											HSP90B1
TMEM87B																											HYOU1
RHOB																											SLC6A9
SFXN3																											PSORS1C1
CRELD2																											PRKCDBP
CTH																											WDR45
TGFB1I1																											C19orf33
WSB1																											HYOU1
TES																											TGFBR2
HEY1																											VPS11
GPR108; MIR6791																											DUSP4
MXD4; MIR4800																											MILR1
CHAC1																											ARHGEF2
C19orf33																											CYB5D1
DNAJC3																											TMEM87B
TSC22D1																											HYOU1
FGF5																											SLC2A6
ANTXR2																											TGFB1I1
RING1																											DNAJC3
GSTO1																											LOX
PYGB																											RPS6KA2
PXDC1																											ZEB1
NOV																											HYOU1
PCK2																											SPOCD1
RGL1																											STX5
SASH1																											PTPN22
MYO1C																											PHYKPL
DAP																											DAP
LRRC20																											TES
PARVA																											PDCD1LG2
KRTAP2-2																											ROBO4
C12orf57; RNU7-1																											C16orf58
DNASE2																											HYOU1
TMEM50B																											PITPNM1
PRKCDBP																											SLC16A1
ARPC1B																											PRNP
SIL1																											MXD4
TGFBR2																											ADAMTSL1
CDC42EP2																											SHISA4
ENTPD7																											PDIA4
MILR1																											CDK2AP2
TM4SF19																											CDKN1A
PHYKPL																											TSC22D1
FBXW5																											PCED1A
ATG2A																											LZTR1
SPOCD1																											FAM167A
PCED1A																											PDIA6
NR1H2																											ANTXR2
COPA																											NMNAT2
MEI1																											CRELD1
NBPF1																											NAGK
SNORD49A; SNORD65; LRRC75A-AS1																											TRAM1
SYT1																											CHAC1
FLCN																											IGFBP6
CYTH2																											HEY1
ATP6V0A4																											NR1H2
YIF1A																											ARPC1B
SDF2L1																											TINF2
SLFN5																											FGF5
DNTTIP1																											COPA
CLMP																											CRELD2
RGMB																											DNTTIP1
PTPN22																											GFPT1
HDAC9																											CAPN1
SLC2A6																											FBXW5
PDIA6																											KRTAP2-2
CTBP2																											NRP1
VPS11																											ADTRP
PDIA4																											PTPN23
FBXL2																											ARRDC1
PODXL																											HYOU1
CDK2AP2																											TM4SF19-TCTEX1D2
CITED2																											CITED2
SLC39A14																											MEI1
MCFD2																											FNIP1
FAM104A																											SYS1-DBNDD2
EFCAB2																											PARVA
SYS1																											ATP6V0A4
ANXA3																											SARS
WDR55																											KRTAP2-1
BLZF1																											SLC52A2
TINF2																											MYO1C
OGT																											KLF2
WARS																											STAT6
STAT6																											OGT
STUB1																											SPX
LCA5L																											HYOU1
TMED3																											PODXL
VEGFA																											SSR1
ANOS1																											P4HB
NAALADL2																											SLC10A3
MYEOV																											PLEK2
PLEK2																											VEGFA
SHARPIN																											EPS8L2
ARMCX3																											TRIM4
GFPT1																											CD151
PRSS3																											RGL1
RAB33B																											MSLN
KRTAP2-1																											MANBAL
BORCS7																											ANXA3
STK4																											MVP
PLPP5																											GSN
SLC52A2																											LRIG1
ARRDC1																											SESN2
MSLN																											SQSTM1
PTPRB																											CD44
PAX8																											ENTPD7
RAB6A																											PRSS23
FNIP1																											TMEM43
																											VPS11
																											HYOU1
																											MROH1
																											MCFD2
																											EPHX1
																											NEDD4
																											NUCB1
																											UPP1
																											ME3
																											C12orf57
																											PPFIBP1
																											ATG2A
																											HDAC9
																											SSR4
																											NPC2
																											BORCS7
																											ZNF160
																											NBPF1
																											MKNK1
																											CTSO
																											CLIP4
																											ZNF33B
																											ORAI1
																											CCRL2
																											MALL
																											SLC39A14
																											MAP2K7
																											WARS
																											RGMB
																											FLCN
																											GPR1
																											ARMCX3
																											RBCK1
																											GSTO1
																											NME6
																											C21orf33
																											RNF103-CHMP3
																											HYOU1
																											ZFP64
																											GBP3
																											EHD4
																											SUN1
																											SUMF2
																											LRRC20
																											BLZF1
																											C16orf62
																											MAP1LC3B
																											PSAP
																											RETSAT
																											PAX8
																											TUBB6
																											KDM4C
																											SLC48A1
																											PARP3
																											SASH1
																											PYCR1
																											PDIA3
																											HYOU1
																											BCL7B
																											AMIGO2
																											NABP1
																											RNF126
																											SEC63
																											EDN1
																											PYGB
																											WDR55
																											PKM
																											SHARPIN
																											EPS15
																											LGALS8
																											CDC42EP2
																											TRIM8
																											PLPP5
																											PXDC1

## Sheet: MET & GS 
TAC																											SAM
165 common upregulated genes in "MDA-MB-231 MET vs MDA-MB-231 CTR", and "MDA-MB-231 GS vs MDA-MB-231 CTR":													143 common downregulated genes in "MDA-MB-231 MET vs MDA-MB-231 CTR", and "MDA-MB-231 GS vs MDA-MB-231 CTR":														145 common upregulated genes in "MDA-MB-231 MET vs MDA-MB-231 CTR", and "MDA-MB-231 GS vs MDA-MB-231 CTR":														88 common downregulated genes in "MDA-MB-231 MET vs MDA-MB-231 CTR", and "MDA-MB-231 GS vs MDA-MB-231 CTR":
Gene symbol													Gene symbol														Gene symbol														Gene symbol
CXCL8													SUZ12														IL6														FAM111B
IL6													POLE														BCL6														SLC10A5
BCL6													CDHR3														JUNB														ZNF718
SAA2; SAA2-SAA4; SAA4													API5L1														CXCL8														TAS2R14
SNAI1													PPRC1														IL1B														GPR75
FOSB													CCT6A														PER1														GPATCH4
PPP1R3B													KPNB1														SNAI1														FEN1
NR4A2													ESF1														CSF3														PHF20L1
PIM1													POM121														PTX3														ZNF107
CFB													ZDHHC3														SAA2														ZNF780B
SAA1													TMEM184C														PIM1														ZNF780B
PTX3													SERTAD4														CYR61														SFPQ
CXCL1													HIST1H4B														CXCL1														BRCA2
DGKD													TMEM138														FOS														RBBP6
CXCL3													SNRPD1														LIF														TUBD1
SQSTM1													SLC12A2														CFB														HIST2H4A
CXCL2													YEATS4														DGKD														TRMU
MXD1													NCOA6														NFKBIA														HIST2H4B
SLC25A37													RHOU														SLC25A37														NT5DC2
CSRNP1													KIF15														SAA1														DLEU2
DDIT3													ANKRD36														BCLAF1														PHTF1
UBE2L6													LRRC37A4P														TSC22D3														TRMT10C
RPS25													DRGX														NR4A2														LMNB1
ZC3H12A; MIR6732													DHX9														CSRNP1														GEN1
CTGF													ARHGEF10														LMBR1L														SKP2
YPEL2													PPP6R3														GABARAPL1														E2F8
ATF3													RIC8B														CLK4														FBXO43
NAMPT													ANAPC7														CTGF														TAS2R10
IER5													DENND2A														IDH2														ASPM
TM4SF1													NKRF														TM4SF1														NEXN
DDIT4													TIMM21														CXCL2														DNAJA1
CLK4													TAS2R19														IER5														CDK13
ATP13A3													NUP214														CCNB1IP1														TRAPPC12
LMBR1L													SMC2														JMY														HIST1H4H
CYSTM1													SACS														ZC3H12A														MCM10
VGLL4													SAFB														CD274														CHAF1B
RRAS													ZNF197														ATF3														SNRNP35
HSD17B7													FAM173B														PRKAB2														SYNCRIP
PLK2													EIF4A3														RRAS														UHRF1
ERN1													USP9X														DDIT3														CLSPN
GABARAPL1													FAM208A														FOSB														ICK
ITPRIP													LRRC37A3														HSD17B7														ATAD5
CD274													FNTB														DGKD														HIST1H4E
NFKBIZ													CUL3														ITPRIP														LTV1
RGS2													PCNA														CCNG2														BRIP1
TMEM159													TCERG1														LATS2														ANKRD36B
NIPAL3													AMD1														CYSTM1														EDRF1
PRKAB2													SLC25A13														PLAUR														PDE3B
MBNL2													KIF11														RGS3														NSUN2
RYBP													NSUN6														PMAIP1														PPID
PLAUR													ALMS1														DDIT4														EXT1
EIF4A2; SNORA63; SNORD2; SNORA4; SNORA81; MIR1248													MDN1														EPGN														ZHX1
PELI2													STXBP5														CXCL3														FBXO5
HK1													PHAX														SAT2														MCM3
RPL27A; SNORA3A; SNORA3B													POM121C														NFKBIZ														FUS
HES7													CTR9														IL1RAP														ERCC6L2
NBR1													CUL1														PELI2														SUV39H2
MAFF													CCDC88A														IFI6														MTERF2
IDH2													EML5														MAFF														ANKRD26
TMED4													LRRCC1														NAMPT														PDSS1
IFI6													RFX7														DGKD														ANKRD18A
DPYD													SLC35F5														PLK2														N4BP1
PPM1B													CHRNA5														CTSH														NAIP
PROCR													MGME1														FGD6														EML5
CHMP2A													NAIP														ERN1														BRCC3
ALDH7A1													REV3L														DGKD														WDR76
ATG13													HIST1H4E														GALC														PHF14
ERRFI1													ZHX1														SRGN														SMCHD1
G0S2													PPID														ADPRM														NSUN6
EAF1													SUV39H2														OSER1														TTF2
FGD6													NDUFA10														RGS2														PAXIP1
LGALS3BP													ABCE1														PPM1B														BLM
CTSH													MKI67														LCP1														NAIP
WDFY2													HSPH1														WDFY2														CCDC88A
ARFGAP3													SMCHD1														NBR1														HSPH1
DXO													GABRE; MIR224; MIR452														EIF4A2														YLPM1
ST3GAL1													UBN1														EPHA2														CDHR3
MYOF													PCNXL3														ARFGAP3														LRIF1
GALC													EDRF1														PELI1														KIF11
IL1RAP													ANKRD18A; FAM95C														VGLL4														ANKRD52
RGS3													ICK														C1S														GABRE
SDC4													YLPM1														ICAM1														MDN1
ICAM1													RBM45														SOD2														ARHGAP11B
MTMR3													ARHGAP11B; ARHGAP11A														HES7														TM2D3
CA5B													MCM3														HK1														KIF1BP
AREG													N4BP1														ELP2														POLA2
SERPINB1													PTK2														UBALD2														DNA2
ADAMTS1													PDSS1														ADAMTS1														PHAX
MZT2A; MIR4784													PDE3B														MFGE8
BRK1													PAXIP1														MYADM
TMEM2													CDC25A														SDC4
LCP1													DNAJA1														MTMR3
SLC43A1													PRKACB														YPEL2
MYO9B													NSUN2														RUSC2
SRGN													FUS														LIPH
PGK1													HIST1H4H														NOCT
PTH1R													CDK13														BLVRB
NEU1													CLSPN														STK17B
AIP													ANKRD36B														BRK1
HLA-C													MTERF2														TNFRSF10B
PELI1													PHF14														ASB1
CDC42EP4													TRAPPC12														UBE2H
ENO1													TRMT10C														MZT2B
GPI													PUS7														HEATR6
C1S													DHRS13														EAF1
UBE2E2													EXT1; spawla														PVR
C15orf48; MIR147B													RIF1														MYCBPAP
FOSL2													ATAD5														WDR48
ADK													WDR76														NR1D2
ELP2													LMNB1														TBC1D15
ASB1													SYNCRIP														PROCR
NOCT													UHRF1														MAP3K7CL
BCL7A													CCDC138														DXO
C3													SPATS2L														ST3GAL1
FKBP14													MPHOSPH8														FKBP14
FNDC3B													EXT1; hunera														ALDH2
FBXO8													NEXN														UBA6
ADM													SOS1														PLEKHA2
MAPRE3													ASPM														RNF19A
VIM-AS1													E2F8														ALDH7A1
AKR1B1													BRIP1														TPM4
FKBP1A-SDCBP2													AGGF1														MZT2A
MZT2B													HIST2H4B; HIST2H4A														STK4
PVR													CHAF1B														PPDPF
COX7B													TAS2R10														ATP6V1F
ATP6V1F													NT5DC2														TJAP1
ZNF277													DLEU2; MIR15A; MIR16-1; MIR3613														SIAE
UPP1													SNRNP35														ZNF277
PARM1													PHTF1														CSRP1
TBC1D15													TRMU														SERPINA1
SRPK1													RBBP6														YAP1
SERPINA1													TM2D3														PFDN5
B2M													HIST2H4A; HIST2H4B														ECSCR
BET1L													ZNF107; MIR6839														AKR1B1
SLC2A1													FBXO43														METRNL
MAP1LC3B													SFPQ														MAN2B1
UBALD2													SLC10A5														GPX4
POLR1D													FEN1														MAP9
KDM5B													GPATCH4														POLR1D
UBA6													ZNF718														DPYD
PRKAR1A													TAS2R14														C3
UBE2H													TUBD1														MAPRE3
AP4M1													FAM111B														PTH1R
EFR3B																											COG5
HSPA1A; HSPA1B																											PHLDA1
STAG2
CETN2
PLEKHO2
ITGAM
FAM46C
TPM4
APLP2
BAMBI
GSTM4
SLU7
GSTM3
LAT2
CD68
DNASE1L1
FAM122C
SOD2
SQRDL
CCL20
LRRC58
PTPRJ

## Sheet: unique genes MDA 2DG vs MDA CTR
TAC																				SAM
185 upregulated genes included exclusively in "MDA-MB-231 2-DG vs MDA-MB-231 CTR":										58 downregulated genes included exclusively in "MDA-MB-231 2-DG vs MDA-MB-231 CTR":										163 upregulated genes included exclusively in "MDA-MB-231 2-DG vs MDA-MB-231 CTR":										6 downregulated genes included exclusively in "MDA-MB-231 2-DG vs MDA-MB-231 CTR":
Gene symbol										Gene symbol										Gene symbol										Gene symbol
CYP4V2										EDEM1										CYP4V2										RIBC1
SNAI2										OR52K2										TRIOBP										JAZF1
TMCC3; MIR7844										NCAPD2										DHRS12										SEMA3E
NPAS2										COL7A1; MIR711										SLC22A18										SIDT1
ITGA2										SUPT20HL2										GFPT2										UCP2
SLC22A18										COQ3										NPAS2										PIR
GFPT2										APOE										TTC17
TRIOBP; NOL12										GAGE10										PLXNA3
TTC17										RAB9B										HMGA2
ASIC3										PASK										ABCA3
SLCO4A1										MYOM2										SLCO4A1
CHPF										SPATA31A7; SPATA31A5										NIPAL2
CARD6										TUBA4A										CARD6
E2F5										HMBS										DYSF
RNF170; MIR4469										SNX32										CD58
HMGA2										PRAMEF2										RNF170
MEPCE										UBE2S										CHPF
DHRS12										TCEAL5										TMEM63A
MEIS3										CD1C										TANK
CATSPER1										RFC3										TMEM143
TANK										SLC38A8										SYNJ2
SH3KBP1										CCDC54										TLR4
TMEM255B										HMGN5										SLC22A4
SYNJ2										C1orf131										PLXNA2
NIPAL2										FAM153A										EXD2
ATP6V0A2										PRR3										ASPRV1
TLR4										CCDC84										RASGRF1
CD58										FFAR1										VAMP2
TCIRG1										ENKD1										ICA1
PCDHGC3; PCDHGA12; PCDHGB4; PCDHGA8; PCDHGA1; PCDHGA10; PCDHGA11; PCDHGA2; PCDHGA3; PCDHGA4; PCDHGA5; PCDHGA6; PCDHGA7; PCDHGA9; PCDHGB1; PCDHGB2; PCDHGB3; PCDHGB5; PCDHGB6; PCDHGB7; PCDHGC4; PCDHGC5										FAM65A										PPP2R5B
TLR3										HPN-AS1										TRIM27
ICA1										TOX2										ERMAP
FAM102A										PIR										INPP1
SOX9										APCDD1										TMEM255B
IL7										EPPIN-WFDC6										ASIC3
ASPRV1; PCBP1-AS1										AP1M1										HDAC10
INPP1										CEP97										DOCK4
RASGRF1										ZNF738										ITGA3
MGAM2										KRT80										TMEM154
DLGAP4										HES4										PAPPA2
FLNB										TUBA3E										FMNL2
STX5										FANCD2										SOX9
UNC93B1										AMY2B; ACTG1P4										PCBP3
NAGLU										FAM133B										PHYHD1
PRNP										MUC12										ZNF114
HDAC10										MLLT11										HM13
SLC38A7										SNRPA1										FAM102A
FMNL2										POGZ										BCAR3
SLC22A4										HNRNPCL4										TCEA2
TRIM27										MATN2										MEIS3
SLC39A13										CTSV										SERINC2
LZTR1										KIF2C										TRIB2
ZNF114										UCP2										ITPR3
OPTN										MNS1										DLGAP4
ERMAP										ING3										FLNB
SLC37A1										RIBC1										SPTLC3
RCAN3										TP53I11										SLC37A1
FILIP1L										SEMA3E										TBC1D17
ARRDC4																				CCNJL
ITGA3																				PCDHGC3
ATP8B1																				MEPCE
C11orf45																				TCIRG1
LMO4																				FILIP1L
TMEM150A																				VEGFC
BBOF1																				EML6
PPFIBP1																				DNASE2
SERINC2																				CD59
VEGFC																				SCAMP4
NPEPL1																				IGFBP4
NEDD4																				SH2B3
PHYHD1																				SMAGP
TRAM1																				SMIM19
SPTLC3																				ZNF81
APBB3; MIR6831																				ATP6V0A2
HM13; MCTS2P																				ATP13A2
PTPN23																				TMEM150A
SLC35E2B																				ELOF1
SHISA4																				LY96
FN1																				UNC93B1
BCAR3																				HECTD3
LACC1																				EHD1
NAGK																				FAM114A1
FAM214B																				C11orf68
SERF2																				CAPRIN2
C16orf45																				NDE1
PDCD1LG2																				JOSD1
ATP13A2																				PINLYP
PCBP3																				PSMA3-AS1
PINLYP																				IL31RA
ZBTB45																				DENND6B
NME6																				NMI
EPS8L2																				GTF2IRD2
TSACC																				OPTN
PRSS23																				LOC389602
ZNF311																				B3GNTL1
PTRHD1																				FMO5
TMEM154																				COL27A1
PKIG																				MAVS
TEN1; CDK3; TEN1-CDK3																				C11orf45
DENND6B																				NAGLU
SLC26A6; MIR6824																				SLC2A6
TP53INP1																				LMO4
EBF4																				SLCO1B3
EHD1																				ALOXE3
NDE1; MIR484																				ATP8B3
CAMK2N2																				PTRHD1
TMEM8A																				ANKH
FMNL3																				CDH4
PCDHB10																				CSTA
TMEM222																				FLNA
SLC10A3																				SLC35D2
SMAGP																				CA13
TCEA2																				ZYX
ITPR3																				DSCR3
CD59																				PLEKHA6
TBC1D17; MIR4750																				TRIM25
STPG1																				TSACC
PAQR6																				PIK3R2
DOCK4																				CCDC92
OSBPL7																				EBF4
HECTD3																				KIFAP3
COL27A1																				LAMA1
TMEM106A																				BBOF1
NMI																				STPG1
SMDT1																				CATSPER1
FAM114A1																				EPB41L4A
CDH4																				HGSNAT
ZNF81																				COL6A1
FAM57A																				COL13A1
EHD4																				SNX29P2
ILK																				SLC33A1
B3GNTL1																				TMC7
SAMD5																				SLC25A6
NSMF; MIR7114																				MSRA
SLC9A1																				MOB3C
PINK1; MIR6084																				PLEKHG4
AGA																				PAQR6
NAV2																				CSRP1
MAT2A																				TMEM8A
IRF2BP2																				FAM129B
KLF5																				PELI3
PKIA																				ZNF185
FAM84B																				ADGRE5
ZYX																				ABL2
CCNDBP1																				SLC39A13
P4HA1																				GPR17
VPS51																				OSTF1
SMIM19																				TPBG
RETSAT																				PHC2
SH3TC2																				MICAL2
PAPPA2																				GSTK1
LAMB2																				DHX34
ALOXE3																				XBP1
PSMA3-AS1																				SLC25A6
SCAMP4; ADAT3																				TM4SF19
MROH1																				TNC
PC																				AGA
GPR17																				PVRL2
ARMCX6																				SLC35E2B
XBP1																				WIPI1
ACVR1																				ZBTB1
GREB1L																				MGAM2
MAGI1																				VPS51
GJB3
IDUA
MKNK1
MALL
CD151
ALOX12B
LOC389602; AC021218.2
PSAP
MYD88
EPHB2
PDIA5; MIR7110
TIMM9
CCDC92
NRSN2
FBXL14
IL15
FMO5
MOB3C
TRIB2
TRIM8
ABL2
SLC25A6

## Sheet: unique genes MDA MET vs MDA CTR
TAC																				SAM
500 upregulated genes included exclusively in "MDA-MB-231 MET vs MDA-MB-231 CTR":										467 downregulated genes included exclusively in "MDA-MB-231 MET vs MDA-MB-231 CTR":										252 upregulated genes included exclusively in "MDA-MB-231 MET vs MDA-MB-231 CTR":											194 downregulated genes included exclusively in "MDA-MB-231 MET vs MDA-MB-231 CTR":
Gene symbol										Gene symbol										Gene symbol											Gene symbol
PER1; MIR6883										EDEM3										NUAK2											NCOA5
NUAK2										FGF8										PPP1R3B											STARD7
MPZL2										CTPS1										BIRC3											CCNE2
NR4A1										MOCS3										MPZL2											TIPIN
BIRC3										LYPD4										SQSTM1											ZNF75A
PCGF1										HCCS										KLF9											RIPK1
NFKBIA										HOXB7										NR4A1											RIBC2
IRF1										DHRSX										BCL3											PPP1R10
CSF2										EEF2KMT										CSF2											AIMP2
MGEA5										TFAM										PCGF1											ZC3H4
ZFP36L1										FAM86C1										MGEA5											SF3B4
CYR61										ANKRD16										MXI1											TRIM27
BCL3; MIR8085										C2CD3										LPCAT4											ZNF708
CLK1										ZNF626										CLK1											DGCR8
LIF										KCNMB3										TGOLN2											CHAMP1
SERTAD2										NPIPA1										ARHGAP17											ZNF480
RPS3A										U2AF2										ARL5B											EIF5
MXI1										ZNF512B										ANKZF1											ZNF85
KLF9										HAP1										LDLR											PIGW
TPD52L1										KIAA0196										VPS8											NRP1
DBP										PRPF40B										TRAPPC4											ZNF780A
ARHGAP17										ZNF12										CISH											CSK
TRAPPC4										ZNF587										MBNL2											FTSJ2
TIAL1										SURF2										SERTAD2											ZNF780A
HBEGF										IL9R										MOGS											ZNF302
LDLR; MIR6886										TBCC										TEF											FOXRED2
GADD45B										ALG5										HBEGF											AGGF1
RORA										ZNF75D										FAM160A1											NSRP1
PDE4D										CDC7										GBP2											CCNF
BACH1										CTDSP1										CSNK1E											XRCC2
PLAG1										UTP23										QPCTL											FAM111A
CREM										CD3E										NOL4L											ZNF530
TTC39B										CYS1										HNRNPK											ZNF354C
H1FX										REXO4										IRF1											BAGE
FAM160A1										SLC35A5										RPS3A											HYLS1
ARL5B										ZNF101										PSMC6											GCC2
LSM6										CHAC1										RPS25											ADAMTS12
SNX33										UNC50										RUNX2											POLR3B
LPCAT4										CFAP73										MLXIP											ADGRD1
GBP2										ANHX										SLC11A2											MGST1
TSC22D3										PIBF1										ATP13A3											ZNF780A
NOL4L										ZNF470										AMN1											C11orf57
DENND3										COL11A2										CD276											POLR3H
EFNA1										DDX17										GADD45B											ZNF195
RPL7A										TMEM265; SRCAP										DENND3											MRPL1
YOD1										WDR74										RORA											NOP56
MEF2D										ELP6										PHF21A											TRMT6
CCNB1IP1; SNORD126										PROSER1										CREM											HGH1
TEF										SLC45A4										NRP2											SNAI2
CSF1										HIST3H2A										MYLIP											ZNF681
VPS8										NAA40										PDGFA											UMPS
ACSS2										C12orf65										F11R											ZNF253
ANKZF1										CTDP1										CSNK1E											ZNF35
HLTF										EFCAB5										USP3											BRCA1
AOC2										SRRD										TIAL1											ZNF780A
MLXIP										SLC27A3										RTN2											MRFAP1L1
FAM8A1										SAMD9										THRAP3											RIF1
MYLIP; MIR4639										GTPBP10										DGKD											ZNF268
SEZ6L2										LY6G6E										YOD1											GDPGP1
CISH										RTKN2										PDE4D											CENPN
SNORD89; RNF149										PLAC8L1										PPARGC1A											ZNF223
JMY										GOLGA1										SRPX											IMP3
MIDN										ZNF761; TPM3P9										RFPL4A											THAP7
MOGS										TFIP11										DLG4											MRPL15
GABARAPL2										FAM26E										TNFRSF11A											THAP5
F11R										ZNF552										ITGA5											ZNF100
TGOLN2										ATMIN										LIPG											SPC25
RFPL4A										SMIM12										CA9											ZNF12
ZNRD1										ERGIC1										B4GALT3											VANGL1
POGZ										ZNF486										H1FX											TARDBP
PSMB9										CYP2R1										LRRC75B											SKA3
LATS2										NKX6-2										EFNA1											VAPB
AMN1										CENPQ										FAM8A1											GINS3
ITGA5										CBX6										NAP1L1											SETX
PHF21A										FAM25G; FAM25C; FAM25BP										POGZ											ZNF35
LIPH										ZNF737										TIPARP											TOE1
STEAP2										C18orf54										NFYA											RAB28
PDGFA										ELAC1										PER3											CENPE
ACSF2										HAUS6										VAPA											UTP4
DOCK2										MYL1										SCAMP1											LACTB2
PSMC6										ZSCAN5A										ZNRD1											ZNF845
SLC11A2										CYSRT1										ACSS2											CENPO
ZBTB20; MIR568										URB2										RYBP											PHF23
PER3										ZFP69B										ROPN1L											CLP1
CSNK1E										KAZN										UGCG											FAIM
GRAMD1C										EIF4G2; SNORD97										CORO2A											MKKS
TGFBR3										LINGO1										BMP2											THEM4
MYO6										BAG1										CHMP1B											DOLK
S100A13										TECPR2										MID2											SETMAR
ROPN1L										MSGN1										GNAZ											PDF
SCAMP1										SSTR3										PPARG											MTFR1
WFDC2										DISP1										BHLHE41											CTPS1
RPL36A										HIST2H3A; HIST2H3C										NNMT											CPTP
SSPN										PADI6										CLK3											DCLRE1C
MID2										TM4SF19										CELF2											CCDC150
TMEM53										TAS2R30; TAS2R43; PRR4										MIDN											ZSCAN32
UGCG										ADAT1										NAV1											PRIM1
MIEN1										ZNF557										GALNT3											PDPR
RTN2										ISLR										PNPLA7											PKD2
PPARGC1A										ZNF17										R3HDM2											ALG6
FLOT1										KCNQ5										HINT3											INTS5
ARG2										PRMT7										GRAMD1B											C3orf62
KDM5C										CCNY										HDAC5											ROCK2
TMEM238										TPTE										NIPSNAP1											ZNF780A
NRP2										INTS5										FAM83B											C3orf35
OSER1										RGPD4										CSNK1E											ZNF804A
NUP210										DBF4										FAH											DCP1B
RSRC2										CRYGS										TTC23											ZNF92
DRAM2										GNRH1										CNOT8											PRMT6
RFPL4AL1										ZNF415										GABARAPL2											ZNF724P
EPHA2										MON1A										HCFC1R1											ALG1L2
NNMT										HRCT1										GRAMD1C											TRAPPC10
CCL2										STK38										RSRP1											EXOSC2
CCBE1										TRIM21										APOBEC3D											ZNF71
ADA										TMEM104										TRIQK											PTRH2
ST8SIA4										ASAP1; ASAP1-IT2										DDTL											ZNF587B
CPEB2										FLYWCH1										DNAJC7											ZNF43
THRAP3										UTP14A										RBM26											C2orf44
CA9										TPH1										SPRY2											ZNF239
TM7SF3										PDGFC										NUP210											PSMG3-AS1
PLD3										RAD51										DHRS1											TRAM2
LIPG										WDR3										CPEB2											LGALS2
C9orf72										RNF40										TOMM7											ZNF37A
RPL22L1										DPY19L3										FBXL5											ARHGEF39
LINC00173										L3MBTL2										INSIG1											THAP11
MAP3K13										CTAGE8; CTAGE4										PLAC1											CTAGE8
CTBS										NXF1										TRAPPC4											TRAK2
USP3										NIFK										C1orf52											HNRNPM
CHMP1B										WDR37										COX7B											SACS
FIGN										BRF1										ARPC3											SLC35E3
CD55										CARD6										SNX33											POLR1A
HMSD										ZNF35										WBP2											TM2D2
PROS1										CIAPIN1										PSMB9											TAS2R50
WBP2										TRPM7										KLF3											CWF19L1
HNRNPK										NOP14										DLC1											PGBD2
PPARG										COA7										KDM5C											NIPAL1
ADPRM										NPAT										CDKN1B											ZNF780B
NAV1										EME2										SIX1											C6orf62
HEBP2										MALT1										PIM3											LANCL2
TOMM7										ORAOV1										CHRM3											RBAK
HDAC5										ZNF665										FAM200B											NDUFA10
JUP										LOC389834; AL354822.1										CUX1											EPC2
IFIH1										PTRH2										TGFBR3											TADA2A
VAPA										STIM2										CD55											YAE1D1
ID1										GCNT6										TP53INP1											SETD1A
PIM3										ALDH1A2										BCKDHA											ZNF75D
PITPNM2										URM1										RBM7											NIFK
SPRY2										RARS										LGALSL											ZNF625-ZNF20
CHRM3										TADA2A										SH3RF2											SDPR
DEPDC7										ADAMTS4										RARB											PRIMPOL
SIX1										C16orf70										SIK1											SPRTN
ESRP1										TTBK1										WDSUB1											ZNF782
PFDN5										QRICH2										BEX5											ZNF776
DAB2										PYCRL										CHD2											CYP2R1
NAP1L1										FAM86B1										WFDC2											PLEKHA8P1
PML										NOL11										SERTAD2											NUP62
GRPR										GDPGP1										VPS8											ORC6
BDH2										WDR46; MIR6873										ZNF143											SMARCAD1
FBXL5										TAS2R31										TMEM53											WDR5B
NR1D2										LAIR2										IFIH1											SRSF1
CTTNBP2NL										NDC1										DDT											NOP58
ATF7IP										CHTF8										GCOM1											DGCR8
TAGLN3										WDR5B										ZBTB20											GPR52
RBFOX3										PSPC1										TRAPPC4											ZNF114
SBF2										RRP36										FIGN											PRKACB
SIPA1L1										ZNF736										BTN3A2											KCNQ5
DLG4										LRIF1										ARG2											ZC3HAV1
STK17A										KIN										SSPN											FAM173B
GRAMD1B										CUL5										C9orf72											ZNF559-ZNF177
CHD2; MIR3175										ERG										REL											ERG
RBM26										EIF3J										BSDC1											BMS1P20
CCNL1										SRSF1										RFPL4AL1											PTER
CRY2										ERCC6L2										SPIDR											ATRIP
LTBP4										MUM1										VAT1											LSG1
HEATR6										HSF2BP										KLHL15											ZNF367
NFKB2										DCLRE1C										TTC39B											ARHGAP31
FBLN5										BMS1P20; IGLV1-51; IGLV5-52										PITPNM2											AP5M1
KLHL24										TUBB4B										CSF1											NOL9
SAMD4A										SLC9A2										BET1											ZFP82
NIPSNAP1										YAE1D1										DBP											RNF220
KLF3										TLE1										LDOC1											SLC45A4
TNFSF12										ADGRV1										RPL22L1											NPAT
TTLL3										ALG1; NAGPA-AS1										POU2F1											ASNSD1
HCFC1R1										RFXAP										DRAM2											ZNF502
COX17										AP5M1										CIB1											TBX2
B4GALT3										BOP1; MIR7112										S100A3											SLC25A24
TSPAN13										NOL9										ERICH2											NOL6
PDCD4; MIR4680										OBSCN										LINC00173											TM4SF19
SPIDR										GINS1										JAG1											COA7
PLAC1										ZNF625-ZNF20; ZNF625										ACSF2											NOL11
SNX5										MRPS18B										RPL36A											SLC30A6
R3HDM2										OGFOD1										RAB11FIP5											ANKRD36C
S100A3										MTBP										GRPR											EED
TMEM167B										MRPS7										OTUD1											CYSRT1
TNFRSF11A										LRRC69; MIR4661										RPL7A
LGALSL										KIF24										POLR3D
MYEF2										ZNF200										STARD4
POU2F1										PRKAB1										TSC22D2
ATF7; NPFF										PKD2										GABBR1
MFSD6										NUP62; IL4I1										SP110
CNOT8										MAX										PAPSS1
BEX5										ZNF804A										MYEF2
FAM110A										FRMPD2B; FRMPD2										RBFOX3
PLEKHA2										TCP10L2										BLOC1S1
GALNT3										CCDC18										CERCAM
MYH9										PPP2R1B										DEPDC7
BMP2										C6orf62										OSBPL6
ORAI3										ASNSD1										TM7SF3
APOBEC3D										TSEN2										LEPR
ARL6IP5										ZBTB24										ATF7
DNAJC7										AQP2										CRY2
C14orf37										LMO2										CACNB4
AHR										ZNF611										PLEKHM3
STK17B										SCYL3										BCAT2
FAM200B										KIR2DL4										CCBL1
ZNF697										KIDINS220										STK17A
CARD19										C14orf169										MIEN1
MFGE8										TBC1D24										WDTC1
BUD31										ZFP82										C4orf3
WWP1										KIF1BP										C6orf136
MYADM										ZMYM1										KLHL24
GOLGA4										FLRT2										GAB2
PRTG										MOB3A										MIIP
BLOC1S1										PSMG3-AS1										FBXO8
SRPX										RGPD3										GATA2
PTAR1										C2orf71										FURIN
C1orf52										UBXN8										ACOT13
GEM										GRWD1										PRTG
RSRP1										MMACHC										TMEM167B
MRPL34										ZSCAN32										FEZ2
GNAZ										CHRNA4										MEF2D
C16orf87										NOL6										SERPINB9
TRIQK										NDOR1										CEBPB
GKAP1										AMIGO2										PLA2G4A
CLK3										KIAA0100										C12orf76
ALDOC										ZNF613										TPD52L1
TNFRSF10B										FAM135A										AHR
TSC22D2										DCP1B										KLHL36
LEMD2										SPATA31A5; SPATA31A7										TIFA
ARNTL										DEPDC4										JARID2
COG5										NOP58										SEC61G
C12orf76										SGTA										GPCPD1
DHRS7										TMEM217										ARL6IP5
HINT3										MSH6										RAP2C
EZH1										TMEM209										TRAF3IP2
TCEA3										BRCC3										FBLN5
ST3GAL5										KLHDC4										CIR1
OSBPL6										ZNF502										CAMLG
RARB										CCDC144NL										MPST
BCAT2										SPRTN										SNORD89
SLC1A3										SRSF6										ALDOC
ERAP2										LSG1										ETS2
BNIP3L										RBBP8; MIR4741
CAPN1										CEP72
POLR3D										TRAM2
FAH										MKKS
RBM7										LRRC37A
NQO1										THAP11
ZNF184										LYSMD4
IFI27										DEFB113
SLC25A1										SFXN5
TMED1										SLC27A4
TCEAL4										UTP20
MSMO1										KRT7
BLVRB										SMARCAD1
NLRP1										SLC38A4
ANKRD37										MSH2
C14orf159										SF1
ABCA1										RBAK; RBAK-RBAKDN; RBAKDN
B4GALT4										SMG8
WDTC1										HIBADH
CORO2A										ZNF559-ZNF177; ZNF177; ZNF559
CBFA2T2										NCLN
KISS1										ANKRD26
ECSCR										HEATR5A
NEDD1										ADORA2B
ARPC3										ERCC6L
ZNF143										ZNF829
VAT1										GTF2H3
KLHL36										ANKRD36C
NFYA										ZNF518B
TRAF3IP2										MFAP3
ARMCX2										SLC25A44
SATB1										CTDSPL
GPR75-ASB3										KIAA0125
COMMD6										GPR52
TTC23										LINC01590; SMIM8
HSPB2; C11orf52; HSPB2-C11orf52										LANCL2
BTN3A2										NIPAL1
LDOC1										ARHGAP31
IL13RA1										TIMM10
TMEM91										GXYLT1
SEC61G										PCNT
UVRAG										ZNF208
C6orf136										NAT1
LRP2BP										TM2D2
CERCAM										RPSAP58; RPSA
FBXO36										MRTO4
LRP1										SH3BP5L
MAN2B1										LEFTY2
NFKBID										MCM9
ALDH2										RAD54L
VPS33B										HNRNPM
B3GNT3										LSP1; MIR7847
DDTL; DDT										RAB28
NKX2-1										DNAH5
RNF214										ZNF138
OTUD1										CDC6
CNBD2										SLC30A6
CRAT										C12orf4
CUX1										EED; MIR6755
ACAD11										NAALADL1
CELF2										C3orf35
AK3										SKA3
BSDC1										TAS2R50
BCKDHA										C19orf47
PNPLA2										ZNF100
CSRP1; markobu										SLC35C1
VAMP8										SLC25A24
CEBPB										RNF25
CACNB4										THADA
SGEF										ALG2
INO80D										PTER
TAP1										OIP5
BET1										SYNM
SP6										ZNF845
P4HA2										CLN6
SERPINB9										CASP8AP2
OSR2										TRAK2
METRNL										CPTP
FAM83B										ZNF587B
RFFL										POP4
PNPLA7										THAP7
PIGV										MKL2; TVP23CP2
REL										ZNF724P
SLC25A27										PDPR
TCF7L1										SMURF2
H1F0										ZNF222
CAMLG										TAF6L
NDUFA2										ZNF780B
OSTF1										IMP3
FEZ2										DBR1
ZBTB5										AFG3L2
UBE2W										POLR1A
RNF169										VANGL1
INPP5B										SH2D4A
WDSUB1										B3GALT6
XAGE1B; XAGE1E										RHOBTB2
HSPG2										DGCR8
MDFIC										ZNF439
COX10										EXO1
XAGE1E; XAGE1B										C7orf49
GPX4										POLA2
ZNF25										ATRIP; TREX1
SIAH2										DOLK
CDS1										ZNF595
CLDND1										LACTB2
FUT10										THEM4
TBCA										ZFP30
ERAP1										ZNF71
ATXN1L										UTP4
PTPRO										ZNF776
CDKN1B										TGS1
STX8										SPDL1
ZBTB10										SLC25A26
C11orf68										LGALS2
NCEH1										MRPL15
DSTYK										SETX
CAMK2D										CENPO
INSIG1										PRIMPOL
TDRKH										ZNF789
PCGF2										ZNF43
DHRS1										EDNRB
GATA2										SLC35E3
TTBK2										PRICKLE1
SAV1										ALG6
RIN2										TARDBP
CMTM7										WDR73
EPS8										ZNF302
USP2										ALG1L2
BLVRA										ZNF841
CACNA1A										PRMT6
ZDHHC1										ZNF354C
MRPS5										ROCK2
RBM24										CWF19L1; SNORA12
C10orf10										TRMT6
SEC23A										ZNF367
RALB										ZNF239
LRRC75B										MCAT
ERICH2										TRAPPC10
ACSS3										TRIM26
CHRDL1										MRFAP1L1
DLC1										ZNF92
WDR59										FOXRED2
RAD1										CCDC150
RAB6B										CENPE
PHACTR1										SPC25
TBC1D10A										NRP1
C4orf3										RRS1
C15orf57; MRPL42P5										FAM111A
FOXN3										MRPL1
ING1										APC
ITGA6										EXOSC2
TRABD2A										SNAI2
UHRF2										SETD1A
MORN4										ZNF223
MAPT										CSK
KLHL15										ANKRD52
STARD4										SETMAR
CAPG										CHAF1A
GOLPH3L										CTAGE8
ZNF532										ZNF681
ETV6										PDF; COG8; TMED6
ARID3B										C1QTNF3
FXR2										MTFR1
FAM134C										VAPB
CLECL1										FAIM
IFITM1										ZNF253
FBXO3										CENPN
DCTN3										HYLS1
NISCH										PHF23
DEF6										ZNF708
ZFP36L2										POLR3B
BLOC1S3										C11orf57
SEPN1										ZNF37A
GPCPD1										HGH1
GRINA										ZNF782
CNKSR3										POLR3H
FAM234A; ARHGDIG										GEN1
HADHB										C2orf44
DDT										UMPS
RNF123										ZNF195
LYST										BAGE; BAGE4; BAGE3; BAGE2; BAGE5
TNIP1										C3orf62
TRPT1										ZNF268
SP110										BRCA2
FHL2										ADAMTS12
ATRX										CHAMP1
ETS2										ADGRD1
ZDHHC8										ZNF85
RGS9										AIMP2
CHCHD10										GINS3
PDP2										CCNF
PNPLA8										EIF5
RAP2C										TOE1
MLLT11										GCC2
TP53INP2										FTSJ2
LEPR; LEPROT										DGCR8; MIR1306; MIR3618
CSRP1										NSRP1; MIR423
ZFHX4										ORC6
ACOT13										TRIM27
MKRN1										SF3B4
CDK7										ZNF75A
GNS										RIPK1
PGM3										ZC3H4
VPS41										NOP56; SNORD57; SNORD56; SNORA51; SNORD110; SNORD86; MIR1292
HAGH										TIPIN
TMEM261										PPP1R10
STX7										XRCC2
BLOC1S1-RDH5; RP11-644F5.10										RIBC2
PHLDA1										MGST1
SNRPD2										PIGW
PDLIM1										ZNF480
NFIL3										GPR75
FAM60A										STARD7
RBMS3										CCNE2
TMEM59										NCOA5
CCDC28A
NPC1
GAB2
PPM1K
DNMT3B
UIMC1
FOXK1
ASIC1
CHMP5
PLD6
BTN2A2
BACE2
IL12A
GALNT6
CDR2
IL17RE
CKAP4
DPP4
SGTB
OSMR
GMPR
CRTC2
RNF44
MED12
MSL1
AMOTL2; MIR6827; RPL39P5
CSTA
MPST
XPO7
TBC1D30
NFE2L2
IGFBPL1
LCA5

## Sheet: unique genes MDA GS vs MDA CTR 
TAC																				SAM
648 upregulated genes included exclusively in "MDA-MB-231 GS vs MDA-MB-231 CTR":										555 downregulated genes included exclusively in "MDA-MB-231 GS vs MDA-MB-231 CTR":										987 upregulated genes included exclusively in "MDA-MB-231 GS vs MDA-MB-231 CTR":										743 downregulated genes included exclusively in "MDA-MB-231 GS vs MDA-MB-231 CTR":
Gene symbol										Gene symbol										Gene symbol										Gene symbol
IL7R										ACAT2										IGFBP3										ZDHHC6
IGFBP3										RDH10										SRGN										DHX15
SPX										SLC16A10										IL7R										RFX7
TSNAX										PANK2										TAGLN										BPTF
CLDN1										TRA2B										ZNF664										MKI67
CEACAM1										SETD2										SDF2L1										FASN
TAGLN										UBR1										SLFN5										PHIP
MRPL4										TRMT61B										HK2										FAM208A
GMPPB										FBN3; mumari										MSTO1										ZFR
ALOX5AP										AGAP6										ALOX5AP										NPRL3
SESN2										MRGPRD										EFR3B										SOS1
ZNF664										CCAR1; SNORD98										CD68										QSER1
ESM1										FSIP1										SEL1L										LONRF1
C16orf72										HIST2H3A										ESM1										TAF2
HAS2										TMSB15A										CDK5RAP3										ACOT13
HK2										PDSS2										GTPBP2										DDX46
GTPBP2										AGL										NEU1										MINPP1
ALPK2										PPP2R5D										KRTAP2-3										STK3
INHBA										GYG2										HAS2										DNAAF5
FICD										CES1										GMPPB										WEE1
CLIC3										LST1										TUFT1										ZNF106
ANKRD1										BCL9										FICD										FAM72D
USP34										TBC1D2B										EFTUD1										HSPA4L
SEL1L										PPIAL4F										MRPL4										SCD
RBM3										KIF23										ALPK2										CDCA2
PPP2R1A										REPS1										CCNT1										STXBP5
TMEM184A										BCL3; MIR8085										C16orf72										CENPF
CCNT1										NCAPG2										SDSL										DDX26B
MSTO1; MSTO2P										GNL2										RBM3										METTL10
ACY1										ZNF618										CLDN1										PAPD7
FIBP										HMGCR										RNASEH2C										NCOA6
PYCR1										LINC00550										TMEM184A										ZNF652
KRTAP2-3										C21orf59										DMKN										CCNB1
NRP1										PTPRG										ANKRD1										SLCO4C1
EFTUD1										KIAA1804; MLK4										ABCD4										ALMS1
ADAMTS9										GTF3C1										IPO5										CREBBP
FAM175A										SRGAP3										INHBA										NFIA
EPHA4										VCL										PJA2										FOXM1
JDP2										TTC32										POLE4										PHLPP2
HMOX1										TRIM47										PPP1R2										R3HDM1
ADAMTS6										BCORL1										HIBADH										HLTF
SMUG1										ETFDH										USP36										CHORDC1
CYB561										AR										TMEM50B										P3H2
TGFA										NDUFAF5										ENC1										CYP51A1
DKK1										MORC2										CEACAM1										SNRPD1
POLE4										CARD10										POLD2										MACF1
TUFT1										SVOP										HYOU1										EIF5B
DMKN										NDUFB9										FPGS										ATP11C
SDSL										TMEM131										DBNL										TBC1D31
TCN2										ITFG1										ICAM2										LEO1
RNASEH2C										IRF6										HMOX1										TMEM19
CDK5RAP3										PIK3R4										PVRL3										SPAG5
ME3										VRK1										EPHA4										ACACA
IPO5										AEBP2										TGFA										FAT1
AKR7A2										CNTRL										ACY1										MAP3K4
PVRL3										CALHM2										WSB1										C6orf136
PACSIN2										GKAP1										ADAMTS6										LEMD3
USP36										R3HDM2										HLA-C										MYB
TREM1										PTBP2										SLC25A45										MAP2K5
HSPA6										TADA2B										USP34										EXT1
ACP2										MAP4										SMUG1										POM121C
ABCD4										BPGM										TCN2										TUBGCP4
SLC22A15										SNRPG										BCKDHB										SAFB
NUCB1										ZFAND4										RNF41										FBXO18
EDEM1										GUCY1B3										MAGT1										TARBP1
ZNF160										EXPH5										ANXA4										PCNA
ACOX1										CALML4										TOM1										NFIB
CLN6										LMBR1										RAD9A										SQLE
EIF2A										EIF3F										ID2										CCNB2
MKX										PAK2										MMP3										GCA
CD44										ALG13										HYOU1										INTS2
DBNL; MIR6837										POMT2										GPAT2										ANKRD36
SFXN2										HIST1H2BG										EIF2A										UBR5
C5orf51										RBM14										PARP8										KCTD3
SEMA3C										TRIM33										DKK1										SNRNP40
ICAM2										ZNF644										CTSC										SRSF11
SH3D21										NUP205										FAU										NUP214
FSCN1										ABHD16B										C5orf51										KIF15
IPO4										SLC46A3										NSUN3										TBCK
TUBB3; MC1R										R3HCC1L										FIBP										FAM72C
RNF144B										NPIPA3										IPO4										DEPDC1
TRUB2										ANKRD13C										ACOX1										AURKA
PPP1R2										STRN3										CYB561										C10orf12
PER2										NFATC3										GNG12										HIST1H2AI
FPGS										CHST4										PPP2R1A										FAM72B
BCKDHB										SPRR1A										ADAM17										PLK1
TRIM2										REP15										KDM5B										KTN1
TOM1										KIF20B										MAN2B2										ZMYM4
CPA4										BHMT										PACSIN2										KIF15
PARP8										COL1A1										SFXN2										PIGU
SSR4										CHD7										JDP2										TMEM99
PHPT1										RRM2B										SERP1										METTL4
CD164										PSMD3										VIM-AS1										SEC24A
PDK1										ITGB3BP										AKAP17A										ATP5J2
GNG12										TIMM50										CLIC3										SMC2
PLCXD1										CDC26										RNF31										KDM1A
SERP1										EZH2										CDC42SE1										LRBA
ANXA4										TAF15										IDH3G										TOP2B
WDR19										DET1										RGL2										FAM189B
FLJ45513; RP11-304F15.3										STRADB										CALR										CHD1
POLD2										RPAP3										PTPRE										MANEA
RANBP2										CELSR2										NT5C										ZMYM2
SLC25A36										C2orf69										NOB1										NUP155
NT5C										TSPO										PGPEP1										CEP350
PJA2										DCAKD										CD24										EPB41L2
PGPEP1										NQO2										AREG										USP28
TMEM116										UTP18										MFAP3										MSL1
RNF31										PRR23C										MAN2C1										PSMD1
HIBADH										OXR1										ECM1										ORC3
TGFBI										AVL9										RAP2B										RTTN
SCAF11										LRP6										FAM175A										HCFC1
STK16										MAP7D3										CHCHD2										CKAP5
RGL2										RALGPS2										PLCG2										SCAI
PLCG2										RPS4Y1										VEZT										POM121
QTRT1										TMOD1										EVA1A										HMMR
MFAP3										PSME4										AKR7A2										TMEM165
STYK1										ANKRD17										RGS14										TNRC6A
PPIB										SNRNP200										GPS2										MRPS9
FAU										PDS5A										FBXW11										SPG20
NAGS										NEK2										CARS										MASTL
DNAJC14										TMEM126A										SRPK1										FADS2
ENC1										ONECUT1										PIGM										ABCB10
MYCBPAP										NHLRC2										ZNF394										RCN2
PDIA3										DCLRE1B										SH3D21										ASUN
LNPEP										ANKRD20A3; ANKRD20A2										GGT1										SMC4
LCN2										LEF1										IFT172										DCAF6
MAN2C1										CRIPAK										PRKRA										CKS2
EIF4EBP1										ARID4B										LMAN2										HNRNPU
NSUN3										WFDC13										ZNF473										GTF2F2
GGA2										IQCH										FAM120AOS										UTRN
MAN2B2										ERMARD										PCK2										EFR3A
LTB4R; LTB4R2										PPP3CB										YDJC										USP34
LIMS1										HMGCS1										EDEM1										PALLD
LGALS8										GLCCI1										EIF4EBP1										HPS3
MMP19										EIF4ENIF1										TRIM2										CCSER2
SLC25A45										PLXDC2										HYOU1										IKBKAP
CTSC										CHUK										TSNAX										KIF1B
DNAJB11										COL3A1; MIR3606										SEMA3C										CUL3
TAX1BP3										GPC3										ARL2BP										CHD8
FAM120AOS										PSMA4										MKX										PATL1
VEZT										KIF18B										SLC22A15										REV3L
ZNF394										CCDC83										POLR3E										UBR3
CARS										HIST1H2AJ										AURKAIP1										WASF1
YDJC										GPR137										EXOSC5										SMARCA5
GNPDA1										LSM14A										CEBPG										EP400
RAD9A										NFYB										TMEM234										CDK5RAP2
ACP1										ERBB2IP										PHPT1										NEIL3
EIF3G										NIF3L1										CA5B										GRPR
WARS2										GALNT7										TAOK3										PRPF4B
BIK										KCNIP3										RAD52										CTR9
TAOK3										ANP32D										TGFBI										CCNA2
BORCS8; MEF2B; MEF2BNB-MEF2B										ANLN										QTRT1										FNTB
TAF10										SPATA5L1										ADM										TRAPPC11
RNF41										WDYHV1										F2RL2										AP3B1
ROMO1										SFTPA1										MYEOV										JPH1
DNAJB5										KAT2A										DNAJB11										TBC1D12
MAGT1										DYNAP										GSTM3										HIST1H2BB
FAM213B										PPIAL4A										PARM1										DPM3
PAIP2; CTB-43P18.1										BAZ1A										FBXL2										KIF14
METTL12; SNORA57										DIAPH1										ALDH16A1										SMC5
ID3										ZNF507										CLIC4										ZNF618
GBP3										PSMD7										UBE3B										INSIG1
SEC61B										RPS6KA1										FNDC3B										FZD6
RNF113A										ORM2										MXD1										HTT
AHNAK										PPARGC1B										SYS1										C5orf42
FBXW11										KLHDC3										LIMS1										RAD51C
CA5A										ENG										CLMP										NEK2
RABL2A										MRPL36										EFCAB2										SSFA2
FYN										SCAF4										ARFGAP2										CSE1L
TMEM234										ZC3H14										C5orf45										USP24
C5orf45										TMC4										THBS1										MSMO1
MMP3										ARFGEF1										LNPEP										NFIC
SPCS3										TPX2										DNAJB5										INPP5F
ZNF473										PTPN3										HCLS1										CCT6A
GLTP										SMNDC1										SLC25A36										KLHL23
TMEM43										NIPBL										ACP1										NHLRC2
MOK										MELK										WARS2										CRYZ
FAM231D; LINC00869										NCOA2										AIP										DHX9
NOB1										PARN										FAM46C										FRRS1
CDKL5										BCL9L										TMEM116										UBE2V2
ORMDL2										DYNC2H1										PAIP2										RNF111
CD24										HIST1H2BH										HSPA13										ACYP1
ING3										TMEM68										PPIB										DROSHA
WDR54										DCAF10										ATG14										IDI1
LMAN2										PLCE1										TRUB2										POLA1
MAFK										GAPVD1										TAX1BP3										PLK4
TRIM4										NSD1										OSBP2										DLGAP5
C9orf91										TCF4										PLCXD1										CUL1
RAD52										VAV3										RNF144B										NKRF
GPAT2										ALG8										CDC42EP3										DNAJC21
TPCN1										ETNK2										AVEN										WNK1
CDC42SE1										PM20D2										SGK3										STRAP
IVD										LPIN1										PDK1										FDFT1
AMIGO2										MSANTD2										SH3RF1										PAK1
CALR										PRKD1										MB21D2										PHF20L1
NEMP2										AGAP9; CTGLF11P										ZNF721										PRKDC
SNAPC2										ZNF462										VIMP										CENPJ
IDH3G										ARID4A										RABL2A										NR2C2
THBS1										SREBF1										CDKL5										CHRNB4
SEC63										DEFA3										CHST11										UNC50
ECM1										IKBKAP										METTL12										EMP2
C18orf32										KIF21A										SLU7										PDCD2L
SELM										BCLAF1										PPIB										SAFB2
ID2										ZNF514										DNASE1L1										FAM102B
TMEM241										EP300; MIR1281										FAM213B										HIST1H3A
POLR3E										ZCCHC11										DNPH1										DDHD1
ZNF721; ABCA11P										ATXN2										OSBPL8										SREBF1
AGMAT										AGPAT1; MIR6721										MMP19										WWC2
ALDH16A1										WWP1										MAFK										SAMD1
AVEN										HPS3										TCEA1										ZNF462
ADGRG2										GDPD1										GLYCTK										MYH15
RUSC2										BMS1										NOTCH2NL										CMTM8
FAM160A2										DLGAP5										PRKAR1A										GNPAT
CLIC4										DEPDC1B										CHRNB1										ATN1
TMEM14EP										PTPRF										SLC25A26										ARHGAP11B
RCAN1										SLC35A4										SLC43A1										GSK3B
C3orf17										BRINP1										TREM1										TIMM23
CCDC84										GIN1										MYO9B										FAM117B
BCL7B										SAP30L										COQ4										MCM6
KRTAP2-4										GULP1										ANOS1										PSMD3
IFT172										TNRC6A										DERL3										EXOSC9
ADAM17										SPA17										ATP6V1D										XRCC5
FSTL3										FAM91A1										EML2										EIF2AK4
VIMP										PPP2R5A										CYTH1										CEP78
AURKAIP1										TP53TG3B; TP53TG3; TP53TG3C										FYN										SCAF4
CHIC2										PKN2										ACP2										BCL9L
GPS2										C1QTNF3-AMACR										WDR19										ANP32E
CEBPG										RBM24										PGK1										CDKN3
SH3RF1										HIST1H2BL										C9orf91										XRCC6BP1
EXOSC5										PARP9										LAPTM5										HIST1H2AL
PMVK										YWHAEP7										NMRAL1										AGAP9
GRAMD4										PITX2										VPS11										TBC1D1
TMEM92										APEX2										APLP2										FAM72A
TPRA1										EME1										MFI2										TPX2
EVA1A										USP46										SLC20A2										PTPRG
RAP2B										STAU2										DBN1										RBM24
GSTZ1										UGT8										RAB36										SBNO1
STK40										ZBED8										WDR54										MYCBP2
LETMD1										GAB1										TNFRSF12A										SEC16A
SSR1										ACSL3										GGA2										SLC35F5
TTC31										SPG20										GPI										ANKRD17
EML2; MIR330										KMT2C										RANBP2										ZC3H14
ATP1A3										PITRM1										GPS1										GTSE1
GLYCTK										FAM24B										SPOCK1										FCHSD2
SPOCK1										SSFA2										PLCXD1										FIGN
MAVS										CDC14B										FAM13B										UGT8
PARP3										FBXL17										NFE2L1										SAMM50
MPI										HNRNPA2B1										TYW1										DCAF10
DOCK10										VSIG1										DNAJC14										ZCCHC11
MTHFR										APLP1										VPS11										SLC25A13
GTF2H1										EIF2AK4										TUBB3										MYBL1
HEXA										HOXD3										SPCS3										PACS1
PPDPF										RCC2										CPA4										ZNF197
ATG14										CCDC77										USP4										FBXL17
TCEA1										CCDC146										GRAMD4										FZD3
P4HB										PSRC1										TTC31										KIAA1328
PBRM1										PRPF8										DDX6										KMT2B
RNF181										CDC42BPA										ARL6IP4										C5orf34
DBN1										PARP4										DHX8										DYNC2H1
MYO1B										DHCR7										ROMO1										ARID4B
ATP6V1D										PRRC2A										LAT2										TCERG1
AKAP17A; SFRS17A										THRA										VGLL3										ANAPC7
CCDC88B										RAB23										MAGEA10										SUZ12
GPR1										PGC										TNFRSF9										KPNB1
KLHL18										RMI1										NEMP2										ATP11A
RPL19										DTL										PTEN										VPS45
NOP9										SAMM50										DGCR14										API5L1
SLC25A26										ATP11A										MKRN2										CRIPAK
RAB36										CYP39A1										HYOU1										AMD1
PPP1CB										MAMLD1										APEH										ATP1B3
GPS1										COL12A1										RCAN1										ARID4A
RWDD2B										HIST1H2AM; HIST1H3J										ETV3										CRY1
RGS14										SHPRH										ICE2										HIST1H1C
RNF126										CISD1										TMED7-TICAM2										TIAL1
DUSP3										ZNF385A										CD164										PPP3CB
CYB561D2										AP3B1										QSOX1										EME1
GPR65										ROBO1										NOV										STEAP1
DMAP1										MGST2										FERMT3										RBM45
ZNF528										HMGB2										CTSZ										TRIM33
SELL										VPS45										LTB4R										ROCK1
DGKA										WNK1										POU2F2										HIST1H2BJ
EPCAM										TERF1										ZNF286B										PPRC1
CDC42EP3										RNF111										TSSC1										AGAP5
ARL2BP										LINC01429										MTHFSD										OMA1
ZBTB3										CENPJ										FAM231D										PPP5C
CHCHD2										NUDT5										HSPA1A										PRRC2A
TYW1										NEUROD1										CHST11										LEF1
NMRAL1										PRSS12										PARD6A										NSD1
PTEN										TBC1D12										RIMKLB										ZNRF1
MAP3K12										CMTM8										CCDC84										GMNN
ZNF76										DPYSL2										SURF4										LRRC37A4P
FKBP10										C5orf34										ZNF335										BCOR
MB21D2										KLHL23										OGFOD3										CDC42BPA
VGLL3										PACS1										KRBOX4										RAB23
ZNF574										SDHA										TAF10										PKN2
GGT1										SEC16A										ZNF419										PDS5A
SNX12										C5orf42										NMD3										GAB1
ARL6IP4										CHRNB4										CDT1										KLHDC3
ARMC6										MSMO1										TAF5L										MTOR
TP53										SBNO1; MIR8072										DAPK3										HMGB2
C2orf42										ACYP1										ADAMTS9										PRPF39
MSRB2										MYH15										IL4R										SLC2A12
SURF4										MTERF3										HYOU1										ROBO1
GALT										DDHD1										SNORD102										PPWD1
ZNF419										KIF14										RAB6A										DRAM2
TALDO1										PPP5C										DMAP1										ATXN2
PARD6A										SMC5										RPS28										HIST1H2AG
DERL3										CEP78										NUMA1										C20orf96
METTL1										ZCCHC14										PRKCA										C2orf69
SUN1										ARV1										HYOU1										USP9X
TNPO1										MYCBP2										WDR36										SLC12A2
P3H4										CDK2										VPS35										HNRNPA2B1
ZNF335										CUBN										ARMC6										C18orf54
CHRNB1										ATP2B4										CLN6										SERTAD4
STRIP2										LRBA										ECE1										COL12A1
ARFGAP2										GLI3										C16orf74										DNM1
CGB5; CGB8										CRY1										MLX										RUVBL1
F2RL2										DTNA										STRIP2										TRIP11
IL4R										OMA1										BET1L										RMI1
TUBB6										EMP2										HEXA										DOCK1
MAGEA10										KAT2B										ACBD3										ARV1
FAM157A										FADS2										CIRBP										LRRC37B
SUMF2										SCMH1										RNF141										MCM8
ATXN1										KRTAP5-5										HSD17B8										PARP14
OSBPL8										SMC4										RNF181										BLMH
FANCI										MRPS9										FAM157B										ERBB2IP
ICE2										ZDHHC14										GLTP										RGPD3
KITLG										SLFN13										GPT2										SPTBN1
C6orf48; SNORD52; SNORD48										GPR135										IVD										PARP4
HCLS1										CEP63										SEC13										BCL3
KAZN										MCM8										SF3B2										ENG
RPS6KA4										STEAP1										TNPO1										SON
KRTAP4-8										PARP14										SH3BP5										CNTRL
SUN3										C20orf96										STK40										ITGB3BP
NFE2L1										HAT1										MTHFD2										PXK
MTHFSD										FAM102B										ARHGEF9										GPR135
SELK										HIST1H2BJ										BECN1										KIF15
CCDC85B										TTYH3										HP1BP3										PPP2R5A
TJP2										KIF1B										RAI14										TTPA
COG6										RBPMS2										CD22										NLGN2
MTHFD2										INPP5F										PEF1										TLE3
PEF1										MAP3K1										DUSP3										TMEM138
GMPPA										PDCD2L										STK36										CHUK
SLC25A39										HIST1H4C										WDFY3										DIAPH1
RHOBTB3										ROCK1										MAMDC2										BCLAF1
HSPA13										KDM1A; MIR3115										C6orf48										ACSL3
RSPRY1										GSK3B										LETMD1										SPATA5L1
YIPF2										FAM72A										MTHFR										AGAP6
CGB; CGB5										FZD6										ZDHHC17										MRPL13
FAXDC2										CPSF1; MIR939; MIR1234; MIR6849										C2orf42										BCORL1
MAMDC2										PAK1										TMEM92										C10orf88
PDCD6										TRAPPC8										DOCK10										GPR137
EIF3F										USP41										NUBP1										HIST1H4C
CPED1										HTT										SLC2A1										SREBF2
FSD1L										GPR157										CCND1										GXYLT2
NOTCH2NL										CCSER2										EIF3G										PAK2
PTK6										KMT2B										C9orf114										RHOT1
FERMT3										ORC3										STUB1										POMZP3
DHX40										GTPBP4										NIPA1										PDE4A
DNPH1										PRKDC										CREBL2										CDC14B
MFI2										CKAP5; SNORD67										DET1										AVL9
USP4										HRSP12										HSPA6										PRRT1
DEAF1										STRAP										GRK6										STRADB
POU2F2										CACHD1										TMEM185B										HIST1H4B
DDX6										DOCK1										TAGLN2										HRSP12
OGFOD3										MAML1										MRPS11										ACSM1
RNF103-CHMP3; CHMP3										TIMM23										USP11										ESF1
ADAMTS17										TMEM165										RPS9										HNRNPD
SEC61A1										GLS										GALT										SPA17
COQ4										RAD51C										BID										GTPBP4
ZNF562										EXOSC9										RPUSD4										CRLF3
SEC13										NUP133										BORCS8										MINK1
TAF5L										PRPF4B										PLD6										HIST1H2AJ
PRKRA										LRRC37B										ASL										ZCCHC2
SLC20A2										GXYLT2										SYT1										KIF21A
MRPL54										HNRNPU										ADGRG2										HAT1
SEMA4C										GPSM2										MRPL21										PPARGC1B
CTSZ										MTOR										TBC1D23										MSANTD2
ARHGEF9; ARHGEF9-IT1										CDK5RAP2										TRPC4AP										PCNXL3
CCND1										RTTN										C1orf198										DHCR7
WDR66										TRAPPC11										PNMA1										TMEM108
ECE1										CDCA3										STK16										MBOAT1
KRTAP4-11										IDI1										NAGS										LMBRD2
UBE3B										EP400; SNORA49										TSTD2										BUB1B
TNFRSF9										INSIG1										PBRM1										CEP192
RIMKLB										CMIP										ZNF503										MYSM1
AKR1C2										CSE1L										OSTC										LRRC37A3
FAM196B										ZMYM2										KCNQ3										PM20D2
NKX2-5										NEIL3										TMED9										RBM12B
PIGM										PIGU										KCNK15										DCLRE1A
POGLUT1										C10orf88										YIPF2										NUDT6
MRPL24										GALNT5										NR3C1										TMEM184C
SGK3; C8orf44-SGK3										RCN2										ZNF76										NUP133
TSPAN31										GPRIN1										MAVS										RIC8B
RNF20										PXK										SERPINB1										BAZ1A
SNAPIN										UBE2V2										CCDC50										HABP4
MRPL48										LOC643355; RP11-88H9.2; toyfawbu										C4orf22										MTERF3
ZNF286B; FOXO3B										EML6										B4GALT2										MGEA5
CGB8										ZNRF1										UBE2E2										LRP8
DCP1A										PRR4										NBN										ITFG1
DHX8										TTPA										HDAC11										OFD1
RAB2B										DCAF6										OSBPL9										PSME4
SF3B2										UBR5										TMEM260										TMEM131
STXBP3										USP34										CHMP3										SRSF2
GPT2										P3H2										KRTAP4-8										KMT2C
CYTH1										HIST1H2AI										AHNAK										CAPN2
MRPL21										SIX4										HDAC9										LRRCC1
KRBOX4										SRSF2; MIR636										SLAMF7										ANKRD13C
VHL										NR2C2										CDK10										TMEM68
LYRM2										TOP2B; MIR4442										KCNK3										ZNF507
RBM12; CPNE1										E2F2										MAF1										SMNDC1
VPS35										GTF2F2										44447										STAU2
ZNF33B										SON; MIR6501										HYOU1										AEBP2
ETV7										SMARCA5										LONP1										PPP2R5D
KLF2										TMEM99										CTNNB1										RBPMS2
ZNF512										TARBP1										DNAJC10										MRPL36
CACNA2D4										WASF1										NDUFAF3										PITX2
RAI14										XRCC5										TPRA1										KIF20B
ST5										ACSM1										TTPAL										KRTAP5-5
SNORD102; SNORA27; RPL21										SAMD1										CYTH2										ADNP
CDK10										DNAJC21										TGM2										TMEM245
SUMF1										EXT1										SNX1										CMC2
STARD3										FAM72B										MSRB2										SKP2
TM4SF1-AS1										FDFT1										PREB										ASF1A
PXDN										FIGN										RHOBTB3										MFAP1
FOXP1										PATL1										SEC23B										NDC80
INO80B-WBP1										PRRT1										NUCB2										YWHAEP7
CTSE										ADORA1										TMEM14EP										OXR1
DAPK3; MIR637										C6orf136										FAM160A2										HIST1H2AM
LZTFL1										ZCCHC2										MRPL57										ATP2B4
PXMP4										GMNN										RAB2B										ZNF385B
CPSF3L; MIR6727										PLK4										SNX12										HMGB3
MAP2K7										RHOT1										GALK2										E2F2
LTBR										PALLD										ZNF562										TRAPPC8
HP1BP3										NFIA										GPR65										KIF23
COLGALT1										SOGA1										GNPDA1										GLS
NMD3										MSL1										UBE2B										LRP6
KIAA0141										MYBL1										EEF1B2										TRA2B
FAM157B										XRCC6BP1										INHBE										RARG
SH3BP5										SEC24A										NKX2-5										SETD2
S100A2										PDE4A										RSC1A1										ECHDC1
CHMP3										DRAM2										ABCC5										ZDHHC14
TSSC1										FAM72C										FSTL3										CYP39A1
ZCCHC7										ZMYM4										PLLP										USP46
VPS53; RPS4XP17										TBCK										ASAH2B										NFATC3
PLPP4										CEP192										CRISPLD2										GALNT7
HAPLN3										ADAMTS3										DOK4										SCRN3
LOC100133091										WWC2										STXBP3										KIF15
LAPTM5										C10orf12										UGDH										TTYH3
TAGLN2										NUDT6										METTL1										PRPF8
DUSP11										HIST1H2BB										AMOTL2										POLE
RPGRIP1L										FCHSD2										DERL2										NSUN7
KCNK15										DPM3										KAZN										R3HCC1L
TSPAN1										TBC1D1										TOP3A										ALG8
GPR183										SRSF11										CETN2										VWA8
DGCR14										HIST1H1C										SEC61B										SRSF4
PRKCA										AURKA										IMP4										MS4A4E
CREBL2										PCDH11X										STARD3										KAT2B
PNMA1										UBR3										ZFPL1										TMEM265
FAM13B										HMGB3										WLS										HIST1H2BG
PLEKHF1										PLK1										ABCA7										NPIPA7
RINL										FAM117B										CYB561D2										KIF18B
ABHD14A										DEPDC1										H2AFY										AHCTF1
SLC35F6										KIAA1328										WDR66										LSM14A
NR3C1										DROSHA										ATP13A3										PARP9
DET1										TLE3										TSPAN1										ONECUT1
MED29										NLGN2										ZFAND2A										SOGA1
PQBP1										SAFB2										GPR183										IARS2
APOA1BP										ATP5J2										KITLG										UBN1
OSTC										CCNB2										FOSL2										DCAKD
PPA2										KTN1										HYOU1										SLAIN2
HSPA1B; HSPA1A										FZD3										GTF2H1										SNAPC1
NUBP1										CRYZ										TMED4										CISD1
ESYT2										CHD1										TPD52L2										TP53TG3B
KATNB1										CKS2										IFRD2										SDHA
ZDHHC17										HIST1H2AL; HIST1H2BN										CCDC9										CMIP
CD22; MIR5196										ATN1										FAM214B										TIMM21
ADAM15										HCFC1										NOL6										PTPRF
TMED7-TICAM2; TICAM2; TMED7										CHD8										THAP9-AS1										SAP30L
INHBE										NFIC										CLCN7										EFCAB14
CSF2RA										UTRN										SDF4										MYH10
GK										ASUN										ABCB8										GGCT
NABP1										MGEA5										NEK7										PIK3R4
HDAC11										TUBGCP4										MDK										SLC6A8
MAF1										GTSE1										ADAM15										ZBTB10
NOL6										GRPR										SLC48A1										CCDC77
ZNF593										ABCB10										ATP6V1G1										GPSM2
ALG1; NAGPA-AS1										EPB41L2										SELM										ZCCHC14
MCCC2										SNAP25										EIF3F										BIRC6
PLSCR3; TMEM256; TMEM256-PLSCR3										MAP3K4										PKIG										CDC25B
MKRN2										MFAP1										SURF4										PITRM1
LAGE3										LEMD3										CHST11										SLC25A27
MRPL57										LEO1										SUN3										RPAP3
CGB7										ACACA										UBA52										ATP11B
PANX1										MANEA										S100A2										BMS1
DOK4										SNRNP40										GMPPA										ZDHHC3
ZNF326										ZNF652										MED29										PPP6R3
GALK2										HMMR										STAG2										TAS2R46
SH2D2A										HIST1H3A										BAMBI										FAM83D
SPC24										CEP350										TMEM39A										TAS2R19
RNF19A										USP24										CCL28										CCDC84
MRPS27										MACF1; KIAA0754										FAM196B										SLC39A10
MCAM; MIR6756										ATF5; MIR4751										SNAPC2										DENND2A
NUMA1										USP28										BOLA2B										SENP3
CYP11A1										CYP51A1										TRIML2										BPGM
TMEM260										BCOR										HGS										NDUFAF5
RP11-93O14.2; VPS35										OFD1										FTH1										LRP6
CIRBP										EIF5B										C3orf17										PPP1R12A
KIF13B										SQLE										RBM12										SIX4
DDOST										HLTF										SUMF1										TRMT61B
LONP1										TMEM19										SLC35F6										ZNF644
CALCA										NFIB										PEX10										NCAPG2
SLC4A5										FAM189B										KAT5										MAP7D3
CCDC74B										R3HDM1										TBC1D2										DET1
DGUOK										INTS2										FAM129A										SNRNP200
MFSD8										QSER1										ALG1										ARHGEF10
CALB1										GCA										PMVK										C11orf54
C6orf89										METTL4										ZBTB2										ZBED8
NRBF2										EFR3A										PLEKHF1										SLC35A4
TBC1D2										MINPP1										AGMAT										NUP205
DPPA3										MAP2K5										CCL20										PDE8A
DRG1										MRPL13										OSGIN1										AGL
IFT140										CREBBP										CPPED1										HMGN5
BECN1										DDX26B										COLGALT1										NIF3L1
CCL28										CCNB1										ARL16										VRK1
ACOT2										STK3										DNAJC11										KNTC1
RPUSD4										KCTD3										GOLGA4										POMT2
CDT1										FOXM1										TSPAN31										LRP6
HSD17B8										FAT1										CPNE5										HIST1H2AK
TMEM39A										CHORDC1										CORO1B										ANLN
HINT2										FBXO18										SLC25A11										PSMA4
CFAP45										JPH1										LGMN										CCDC7
APOC1										ATP11C										FAM104A										ZFAND4
TMEM51										ACOT13										ZFAT										PTPN3
ASL										PAPD7										YTHDC1										WDYHV1
SRP72										HSPA4L										HLA-L										ZNF197
LYRM7										METTL10										STYK1										VPS54
POU2F3										CENPF										VPS37C										WWP1
THAP9-AS1										DDX46										TPCN1										CHRNA5
RGPD6; RGPD5										MYB										NELFE										LCAT
CHST3										SLCO4C1										MTHFD1L										CCDC138
B4GALT2										DNAAF5										TJP2										LOC643355
BCKDK										TAF2										NBPF15										ELMOD3
AARS										ZFR										CAPZA2										MMS22L
PPTC7										ZNF106										PTK6										NMU
CLCN7										SCD										POLDIP3										TAF15
GNGT2										SPAG5										C1orf50										ANP32D
IFRD2										WEE1										DEAF1										SHPRH
RNF141										LONRF1										NDUFC1										CUBN
GALE										NPRL3										DGKA										EIF4E
HSPBP1										PHIP										RABAC1										GPR3
PDXK										BPTF										TRAF1										RAD21
EPS15										DHX15										EIF3F										ILF2
MRPS24										FASN										SLC35B1										REPS1
CTNNB1										ZDHHC6										PIGL										SPAG1
HEXIM2																				ZCCHC7										DNTTIP2
ZFAND2A																				ZNF512										CNOT11
ETV3																				KATNB1										UBE4B
CLP1; AP000662.4																				PROSER2										SCMH1
LIN37																				TRIM5										TMEM184B
OSBPL9																				PTPRJ										GALNT5
ARHGAP42																				TFE3										MICU1
QSOX1																				ZNF414										NCOA2
ARNT																				SURF4										ABCE1
SPSB1																				ID3										PARN
MTIF2																				AK2										TIMM50
C16orf46																				GP1BB										GLIS2
UBE3C																				TMEM41B										MTRF1L
MAP9																				TMEM51										PTTG1
TTPAL																				AP5S1										DCLRE1B
GPR32																				FAM86B2										FAM65A
ZHX2																				DCLK1										TOMM70A
RFTN1																				ZNF326										STAT3
ACBD3																				CGB2										KAT2A
MRPL9																				UGP2										ATXN7
NMNAT2																				NRP1										CDK2
ATF6B																				C18orf32										EPB41
ZSCAN30																				MRPS24										LRRC37A
TRAF1																				CA5A										GPR63
DCLK1																				ADK										CDCA8
FAM86B2																				RNH1										ZNF385A
SYBU																				ZNF18										NUDCD1
NFRKB																				RPL13										MED13
DDRGK1																				GSTZ1										E2F5
RSC1A1; DDI2																				IFT43										RTF1
CCDC50																				ORMDL2										PSMD7
CDC42																				CGB5										LINC01140
TPD52L2																				FRMD6										ADORA1
ZBTB2																				AGTRAP										NIPBL
SCD5																				APOA1BP										FBN1
LAMP1																				C6orf132										STRN3
POLDIP3																				IL2RB										ADGRL1
HERC3																				CD2BP2										SUPT6H
TMCO6																				CREB1										SMIM8
ARL16																				RBM19										KIAA1958
C1orf198																				PLEKHB2										TMEM183B
LRRC46																				MDM2										TK2
MLX																				EMC4										MAML1
GRB10																				SLC39A11										TTC27
OSBP2																				ZNF574										GDPD1
NBPF15																				LOC79999										NFYB
TMEM87A																				BZW1										CEP63
ZNF655																				PGRMC1										PABPC4
C5orf22																				RSPRY1										MAGEA9B
FAM27E3																				SGK3										RTKN2
SNORA17A; SNORA17B; SNHG7																				ZNF358										ARFGEF1
RPS28																				TUBE1										CENPC
IKBKB																				ZNF84										HIST2H3A
PREB																				NT5C3A										DMXL2
CDKN1C																				TIRAP										CHKA
ARHGEF18																				RWDD2B										SLC27A4
ASAH2B																				ZNF136										CHD7
HERC1																				NBPF19										SELO
SLC25A11																				ZFYVE26										CDCA3
DCAF4																				DUSP14										APBB2
CCDC80; LINC01279																				SCD5										FANCM
DSG2																				PXMP4										GLI3
MFAP2																				SH3TC2										TMSB15A
WSB2																				C12orf49										SC5D
TRPC4AP																				PANX1										KIF18B
WLS																				VPS11										DHRS13
PRDM11																				DDX41										SNRPG
USP11																				TK1										CACHD1
FTH1																				CHIC2										HSDL2
POLR2I																				CHURC1										FOXJ2
SLC35B1																				CRCP										CSF1
DLST																				TMEM67										AS3MT
PROSER2																				PPP1CB										EZH2
AK2																				ASNS										CBWD6
KIF5B																				MTIF2										KIAA2026
TMEM185B																				BMPER										HIST1H2BL
NEK7																				MRPL54										MAP3K1
RAP1GAP2																				AARS										MELK
TOP3A																				DAGLB										AGPAT1
KCNK3																				CGB8										CHAF1A
YAP1																				APPL1										LRRIQ3
TGM2																				ATF7IP										GRIK4
NOTCH2																				PLTP										PIK3R3
RABL2B																				MRPL49										THUMPD3
ZNF414																				SAMD4A										SYNE2
VDR																				MAP4K4										USP14
NUCB2																				UNC45A										SLFN13
ABLIM1																				THOC6										PLCE1
WDR36																				LIN37										DICER1
H2AFY																				LAMP3										SMARCC2
BNIP3																				TMED5										TTC32
CCNL2																				HINT2										ANGPTL2
APEH																				EIF2B2										ASH1L
																				GUSB										CD2AP
																				TMED8										C1QTNF3-AMACR
																				PLSCR3										TMEM5
																				RABGGTA										NPIPB8
																				LZTFL1										MYO5A
																				RNPEP										BAZ2A
																				MYL9										CCDC34
																				CDK4										TMEM94
																				CALM1										EIF4A3
																				SF3B1										ZNF138
																				NAPA										FRA10AC1
																				VIM										PRCC
																				44263										KRTAP5-11
																				GPD2										TRMU
																				TMEM106A										LINC01429
																				ADRB2										SLC22A5
																				EXOC7										ZNF514
																				ZC3H8										LRRC10
																				RAB33B										IRF6
																				RNF4										PRSS12
																				RFNG										TCEB1
																				RNF20										SLC35B3
																				MRPL9										CEP55
																				MRPL30										EXPH5
																				PDXK										SLC30A9
																				RPL32										CEP76
																				MOSPD2										HMGCS1
																				MPI										NEMF
																				LAGE3										DYNAP
																				TMSB10										PPIL4
																				SLC1A3										MAPK9
																				AOX1										GTF2E2
																				RRP7A										SAR1B
																				FANCI										EXOSC10
																				ACBD4										EDC4
																				URGCP										HIST2H3A
																				LOC339803										UBE2L3
																				INO80B										NREP
																				PXDN										VPS13A
																				TP53										HIST1H2BH
																				DLST										MLLT11
																				RBFA										OR10P1
																				AP4M1										ATRNL1
																				ZNF593										COL1A1
																				C5orf24										ETNK2
																				DCAF4										ALG9
																				AKAP1										LRRC37B
																				FKBP1A-SDCBP2										ATP10D
																				DHX40										LOC389834
																				CAV1										HOXD3
																				NOTCH2NL										RBM14
																				DEPDC5										CCDC146
																				NME1										PTBP2
																				POGLUT1										TMEM126A
																				LOC100133091										C7orf55-LUC7L2
																				LOC79999										CCNK
																				ZHX2										MPZL2
																				FOXP1										RPGR
																				SLC4A5										IFT81
																				RPS6KA4										SLC27A5
																				CYP11A1										OXCT2
																				PER2										GKAP1
																				ESYT2										RBM25
																				SNAPC5										HADH
																				SEPW1										UBP1
																				NSMCE1										UTP18
																				PNKP										NUF2
																				TMEM230										PARG
																				DCP1A										GAPVD1
																				HERC1										ZNF197
																				EID3										INTS9
																				DDOST										QRICH1
																				MCAM										EP300
																				SLC25A39										UCHL5
																				RPS28										MALSU1
																				IFT140										HIST2H2AA4
																				HSPBP1										TBP
																				PSMD2										LYN
																				CLIC2										THOC2
																				RGPD6										PHF2
																				KDM5A										SF1
																				TMCO6										SPAST
																				ING3										FASTKD3
																				MOK										USP41
																				SELENBP1										HSPE1
																				RPLP2										A2ML1
																				ANXA1										GIN1
																				S100A16										LRP6
																				BLOC1S3										GUCY1B3
																				SH3BGRL3										ADAMTSL5
																				CLPB										BRAF
																				RPL7A										UBR1
																				CPSF3L										NQO2
																				FAM134C										C21orf59
																				ZNF333										ABHD17B
																				DYRK4
																				PRKCE
																				COG6
																				GSTT2
																				TMEM87A
																				ITPA
																				CHST3
																				MCCC2
																				UBE3C
																				UPF1
																				CCDC85B
																				RAB27A
																				RNASEH2A
																				ARMCX5
																				PLRG1
																				KIAA0513
																				ERAP1
																				PRDX4
																				POR
																				CSF2RA
																				ALG5
																				C1QTNF6
																				NHEJ1
																				MAPK6
																				ETHE1
																				LTBR
																				DSP
																				CRIPT
																				MFSD8
																				FKBP15
																				SQRDL
																				ALDH6A1
																				ENSA
																				HYOU1
																				TCAIM
																				CASD1
																				ADCY7
																				RFTN1
																				ADAMTS17
																				TMEM241
																				ATF6
																				APP
																				BIK
																				ZNF674
																				CDK2AP1
																				STOML2
																				ANKRD37
																				FAM195B
																				SLC16A1
																				TMEM106C
																				SNORA17A
																				P3H4
																				TCEB2
																				VPS11
																				LAMTOR1
																				FN3KRP
																				HMBS
																				PQBP1
																				DNAJC24
																				LYRM2
																				AUNIP
																				TMEM263
																				PDCD6
																				TBC1D22A
																				INO80B-WBP1
																				SFI1
																				REPIN1
																				NOG
																				CLP1
																				XPO4
																				GOLT1B
																				FBXW10
																				DIEXF
																				TALDO1
																				ID1
																				HERC3
																				SCN9A
																				MDM4
																				MESDC2
																				KRTAP2-4
																				FSCN1
																				SERP1
																				IKZF5
																				SELL
																				ZHX3
																				CCDC122
																				RNF113A
																				SPSB1
																				GOSR2
																				DRG1
																				FKBP1A
																				CRABP2
																				FAM126A
																				NOP10
																				ABHD2
																				EEF2
																				DDX54
																				KISS1
																				YIPF4
																				PPA2
																				NFIX
																				UBC
																				ARHGAP40
																				VPS72
																				CPED1
																				NOTCH2
																				RASL11A
																				L3MBTL2
																				ALS2
																				CDC42
																				HOXB9
																				ZSCAN21
																				UBXN1
																				GTPBP1
																				WDR73
																				ATXN1
																				CGB
																				SETD7
																				CLK2
																				GDAP1
																				FAXDC2
																				TPD52
																				HLA-F
																				SHMT2
																				C2orf68
																				ZNF678
																				DUSP11
																				ZNF267
																				CASP8
																				ETS1
																				RPL41P5
																				DFFA
																				APOC1
																				DDRGK1
																				RPLP0
																				GLB1L3
																				WDFY1
																				MYO1B
																				CASP9
																				MAP1B
																				EPCAM
																				ANKUB1
																				RBM10
																				FAM174B
																				TIMM8A
																				FAM127C
																				RUBCN
																				GNGT2
																				FAM122C
																				RGPD8
																				LINC00346
																				FKBP10
																				EPHA4
																				ARHGEF18
																				MICAL1
																				IVNS1ABP
																				UBE2J1
																				PRKCH
																				MRPL48
																				MED22
																				RPS2
																				PSEN1
																				LCN2
																				MAEA
																				MGAT1
																				ALDH3B1
																				GPNMB
																				ZMAT3
																				HAPLN3
																				LINS1
																				NUP160
																				GPR101
																				INO80C
																				NKIRAS2
																				RPL19
																				ZNF655
																				TMEM141
																				RPS27L
																				CXXC5
																				SPC24
																				TMEM182
																				UBE2D3
																				KRTAP4-7
																				HSBP1
																				CHID1
																				CCDC174
																				SCAND1
																				CCDC80
																				BCKDK
																				SMAD7
																				GSS
																				IGFBPL1
																				USP15
																				MAP3K12
																				SLC43A3
																				DPP7
																				MED19
																				CKAP4
																				AKAP10
																				HSPA1B
																				UCP2
																				UBE2D4
																				CNP
																				TPI1
																				NDUFV1
																				SHC1
																				SPRR2A
																				PFN1
																				ST8SIA2
																				HEXIM1
																				BNIP3
																				VDR
																				TOM1L1
																				SURF4
																				CCHCR1
																				MOB3A
																				GPX1
																				NSUN4
																				GPR171
																				CHST10
																				CORO1A
																				IGFBP1
																				ABLIM1
																				SLC12A8
																				EIF3D
																				HDAC6
																				CLU
																				ANKRD11
																				TSPAN5
																				OAZ1
																				TUSC2
																				NLE1
																				DNM2
																				SERPINB7
																				TSSK3
																				TRAPPC5
																				PRMT5
																				LCA5L
																				ANKRD42
																				MRPS27
																				ENTPD5
																				CALCA
																				NSF
																				HRH1
